# Supplementary material for: An air-stable radical with a redox-chameleonic amide
Source: Royal Society of Chemistry journal article supplement (doi:10.1039/d2cc05404c), 2022-12-13
Supplement: d2cc05404c1.pdf [file d2cc05404c1.pdf]

# Electronic Supplementary Information

## An air-stable radical with a redox-chameleonic amide.

Jesse L. Peltier,<sup>a</sup> Melinda Serrato,<sup>a</sup> Valentin Thery,<sup>b</sup> Jacques Pecaut,<sup>c</sup> Eder Tomás-Mendivil,<sup>b</sup>  
Guy Bertrand,<sup>a</sup> Rodolphe Jazzar,<sup>a</sup> and David Martin<sup>b\*</sup>

<sup>a</sup> UCSD-CNRS Joint Research Chemistry Laboratory (IRL3555), Department of Chemistry and Biochemistry, University of California San Diego, La Jolla, California 92093-0358, United States

<sup>b</sup> Univ. Grenoble Alpes, CNRS, DCM, UMR 5250, 38000 Grenoble, France

<sup>c</sup> Univ. Grenoble Alpes, CEA, CNRS, INAC-SyMMES, UMR 5819 38000 Grenoble, France

## Table of contents

|                                                                         |    |
|-------------------------------------------------------------------------|----|
| General methods and materials.....                                      | 3  |
| Experimental procedures and characterization data.....                  | 4  |
| Electrochemical studies.....                                            | 6  |
| Monitoring of the decay of radical 2b' in technical ethanol at 60°..... | 6  |
| X-ray diffraction studies.....                                          | 7  |
| DFT studies.....                                                        | 10 |
| NMR spectra.....                                                        | 24 |
| References.....                                                         | 29 |

## General methods and materials

All manipulations were performed -unless otherwise noted- under an atmosphere of dry argon using standard Schlenk or dry box techniques. Solvents were dried by standard methods (Na for ethers and toluene, and CaH<sub>2</sub> for the rest) and distilled under argon. <sup>1</sup>H and <sup>13</sup>C NMR spectra were recorded on the NMR-ICMG platform of Grenoble with Bruker Avance 400 and 500 MHz spectrometers or at UCSD on Bruker Avance 300 MHz, Varian INOVA 500 MHz, or ECA JEOL 400 MHz spectrometers at 298 K. Chemical shifts are given in ppm and are referenced to SiMe<sub>4</sub> (<sup>1</sup>H, <sup>13</sup>C). Coupling constants *J* are given in Hertz as positive values. NMR multiplicities are abbreviated as follows: s = singlet, d = doublet, t = triplet, q = quartet, sept = septet, m = multiplet, br = broad signal. Melting points were measured with a Büchi B-545 melting point apparatus system and an electrothermal MEL-TEMP apparatus. Infrared (IR) data were recorded on Perkin-Elmer GS2000 IR spectrophotometer with a Golden-Gate ATR unit in the solid state and a Bruker Alpha 2 spectrometer, equipped with a platinum ATR using a monolithic diamondoid crystal in an Argon filled glovebox. The intensities of the selected peaks are abbreviated as follows: s = strong, m = medium, w = weak, br = broad. Mass spectra were recorded on a Waters Gevo X2-S Qtof mass spectrometer or on a Thermo Scientific LTQ Orbitrap XL mass spectrometer. Single crystal X-ray diffraction data were collected at CEA-Grenoble on a Rigaku XCallibur S instrument, at DCM-UMR 5250 on a Bruker-AXS-Enraf-Nonius KappaAPEXII apparatus and at UCSD on a Bruker Apex II diffractometer.

Cyclic (alkyl)(amino)carbene **1**,<sup>1</sup> carbazole-9-carbonyl chloride<sup>2</sup> and *N*-formyl carbazole<sup>3</sup> were prepared according to reported procedures; all other starting materials were purchased from commercial sources and used without further purification.

Electrochemical experiments run at 25 °C were carried out with a Biologic SP-300 potentiostat. A silver reference electrode (0.01 M AgNO<sub>3</sub> in 0.1 M [<sup>t</sup>Bu<sub>4</sub>N]PF<sub>6</sub> in CH<sub>3</sub>CN) was used. Cyclic voltammetry experiments were performed in 0.1 M [<sup>t</sup>Bu<sub>4</sub>N]PF<sub>6</sub> CH<sub>3</sub>CN solution. A vitreous carbon disk (3 mm in diameter) as working electrode and a platinum wire as auxiliary electrode were employed. Ferrocene was used as standard, and all reduction potentials are reported with respect to the *E*<sub>1/2</sub> of the Fc/Fc<sup>+</sup> redox couple. Electrochemical bulk reactions were performed using reticulated vitreous carbon electrode. Electrochemical reactions were monitored with a Zeiss MCS 501 UV-NIR spectrophotometer (1 mm cell). EPR spectra were obtained using an X-band Bruker EMX Plus spectrometer and fitted with the EasySpin simulation package.<sup>4</sup>

## Experimental procedures and characterization data

### 2aCl

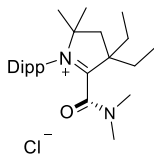

In a Schlenk, dimethyl carbamyl chloride (0.28 mL, 2.98 mmol) was added to a hexane solution of carbene **1** (0.94 g, 2.98 mmol) and a pale-yellow precipitate formed. The solution was stirred overnight and then filtered and washed twice with hexanes (20 mL). The solid was then dried under vacuum to afford a pale white powder (0.77 g, 61%).

**<sup>1</sup>H NMR** (500 MHz, CDCl<sub>3</sub>)  $\delta$  7.47 (t,  $J$  = 7.8 Hz, 1H), 7.33 (d,  $J$  = 7.7 Hz, 1H), 7.29 (d,  $J$  = 7.7 Hz, 1H), 3.52 (s, 3H), 3.50-3.41 (m, 2H), 2.84 (s, 3H), 2.76-2.62 (m, 2H), 2.36-2.14 (m, 3H), 1.93 (dq,  $J$  = 14.7, 7.3 Hz, 1H), 1.84 (s, 3H), 1.47 (s, 3H), 1.42 (d,  $J$  = 6.2 Hz, 3H), 1.32-1.30 (m, 6H), 1.12 (d,  $J$  = 6.4 Hz, 3H), 1.07 (t,  $J$  = 7.3 Hz, 3H), 0.95 (t,  $J$  = 7.4 Hz, 3H).

**<sup>13</sup>C NMR** (126 MHz, CDCl<sub>3</sub>)  $\delta$  193.6, 158.6, 147.2, 146.4, 131.6, 128.0, 126.4, 126.3, 84.2, 59.7, 43.2, 39.8, 35.1, 32.2, 29.9, 29.2, 29.1, 28.0, 27.0, 26.3, 25.3, 24.4, 8.4, 8.4.

**HRMS:**  $m/z$  calculated for C<sub>25</sub>H<sub>41</sub>ON<sub>2</sub> [M]<sup>+</sup> 385.32134 found 385.32019.

**Mp:** 172 °C.

**IR:** 1658 (s,  $\nu_{CO}$ ) cm<sup>-1</sup>.

### 2a•

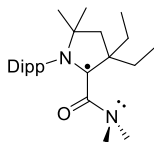

**2aCl** (150 mg, 0.356 mmol) was dissolved in THF (2 mL). Subsequently, zinc dust (11.6 mg, 0.177 mmol) was added to the suspension and stirred overnight to afford an orange solution. Afterwards, the solvent was removed under vacuum, the solid was washed with pentane (2x1 mL) and extracted with ether (10 mL). The solvent was removed under vacuum to engender a yellow solid (121 mg, 88% yield).

**Mp:** 80 °C

**IR:** 1564 (s,  $\nu_{CO}$ ) cm<sup>-1</sup>.

### 2bCl

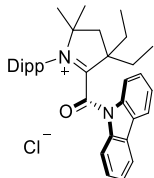

In a Schlenk, carbene **1** (1.2 g, 3.82 mmol) and carbazole-N-carbamoyl chloride (0.88 g, 383 mmol) were dissolved in diethyl ether (40 mL) and stirred overnight. The precipitate was filtered and washed with THF (3 mL), and then washed with toluene (3x5 mL). The precipitate was dried under vacuum to afford a pale white powder (1.95 g, 94%). *NMR analysis shows broad peaks at 25 °C. Therefore, NMR analysis for characterization was done at -20 °C.*

**<sup>1</sup>H NMR** (400 MHz, CDCl<sub>3</sub>, -20 °C)  $\delta$  8.34 (d,  $J$  = 7.8 Hz, 1H), 8.19 (t,  $J$  = 7.1 Hz, 1H), 7.95 (t,  $J$  = 7.3 Hz, 3H), 7.56 (t,  $J$  = 7.3 Hz, 1H), 7.49-7.39 (m, 3H), 7.32 (d,  $J$  = 8.4 Hz, 1H), 7.10 (d,  $J$  = 7.5 Hz, 1H), 3.63 (d,  $J$  = 13.7 Hz, 1H), 2.92-2.81 (m, 3H), 2.65-2.46 (m, 3H), 2.18-2.05 (m, 2H), 2.02 (s, 3H), 1.87-1.77 (m, 1H), 1.67 (s, 3H), 1.44 (d,  $J$  = 5.9 Hz, 3H), 1.37 (d,  $J$  = 6.2 Hz, 3H), 1.19-1.14 (m, 4H), 0.56 (t,  $J$  = 6.7 Hz, 3H), -0.23 (d,  $J$  = 5.7 Hz, 3H).

**<sup>13</sup>C NMR** (101 MHz, CDCl<sub>3</sub>, -20 °C)  $\delta$  189.3, 156.8, 146.6, 146.4, 137.4, 134.2, 132.1, 129.4, 128.4, 127.4, 127.1, 127.0, 126.9, 126.6, 121.2, 120.4, 118.3, 113.8, 86.2, 61.6, 42.9, 32.6, 30.5, 30.3, 29.6, 29.0, 27.4, 26.7, 26.0, 25.4, 23.9, 8.5, 8.0.

**HRMS:**  $m/z$  calculated for C<sub>35</sub>H<sub>43</sub>ON<sub>2</sub> [M]<sup>+</sup> 507.33699 found 507.33499.

**Mp:** 123 °C.

**IR:** 1661 (s,  $\nu_{CO}$ ) cm<sup>-1</sup>.

### 2b•

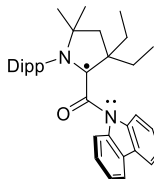

**2bCl** (150 mg, 0.276 mmol) was dissolved in THF (2 mL). Subsequently, zinc dust (9.0 mg, 0.138 mmol) was added to the suspension and stirred overnight to afford an orange solution. Afterwards, the solvent was removed under vacuum, the solid was washed with pentane (2x1 mL) and extracted with ether (10 mL). The solvent was removed under vacuum to engender a pale white solid (118 mg, 84% yield).

**HRMS:** m/z calculated for C<sub>35</sub>H<sub>43</sub>ON<sub>2</sub> [M]<sup>+</sup> 507.33699 found 507.33521.

**Mp:** 177 °C.

**IR:** 1564 (s, ν<sub>CO</sub>) cm<sup>-1</sup>.

**3**

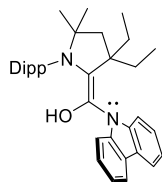

**2bCl** (150 mg, 0.276 mmol) was dissolved in THF (2 mL). Subsequently, zinc dust (18 mg, 0.276 mmol) was added to the suspension, and stirred for 3 hours. The resulting enolate was stirred overnight. Afterwards, the solvent was removed under vacuum to afford a pale white solid. Then, single-crystals were grown from slow diffusion of pentane into a saturated solution of benzene (< 5% yield).

**<sup>1</sup>H NMR** (500 MHz, THF-d<sub>8</sub>) δ 7.99 (d, *J* = 7.7 Hz, 2H), 7.56 (d, *J* = 8.2 Hz, 2H), 7.34 (t, *J* = 7.6 Hz, 2H), 7.16-7.11 (m, 5H), 5.22 (s, 1H), 3.72 (sept, *J* = 6.7 Hz, 2H), 2.05 (s, 2H), 1.58-1.51 (m, 2H), 1.40 (d, *J* = 6.7 Hz, 12H), 1.37-1.32 (m, 2H), 1.23 (s, 6H), 0.91 (t, *J* = 7.3 Hz, 6H).

**<sup>13</sup>C NMR** (126 MHz, THF-d<sub>8</sub>) δ 150.7, 143.8, 138.6, 136.2, 127.6, 125.8, 124.8, 123.8, 120.6, 120.4, 114.4, 112.9, 64.4, 49.6, 45.2, 32.7, 30.7, 29.9, 26.7, 24.3, 11.0.

**4**

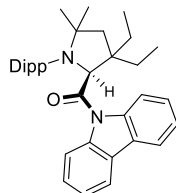

Carbene **1** (50 mg, 0.159 mmol) and *N*-formyl carbazole (31 mg, 0.159 mmol) were dissolved in THF (2 mL) and stirred for 2 hours. Afterwards, the solvent was removed under vacuum to afford a pale white solid (76 mg, 94% yield).

**<sup>1</sup>H NMR** (500 MHz, C<sub>6</sub>D<sub>6</sub>) δ 7.68 (d, *J* = 7.8 Hz, 2H), 7.28 (dd, *J* = 7.7, 1.8 Hz, 1H), 7.24 (t, *J* = 7.6 Hz, 2H), 7.17-7.10 (m, 4H), 7.06 (t, *J* = 7.2 Hz, 2H), 5.27 (s, 1H), 4.39 (sept, *J* = 6.8 Hz, 1H), 3.71 (sept, *J* = 6.8 Hz, 1H), 2.34 (d, *J* = 12.7 Hz, 1H), 1.99-1.90 (m, 1H), 1.88 (s, 3H), 1.82 (d, *J* = 12.7 Hz, 1H), 1.79-1.71 (m, 1H), 1.61-1.54 (m, 1H), 1.42 (d, *J* = 6.8 Hz, 3H), 1.32-1.27 (m, 1H), 1.30 (d, *J* = 6.8 Hz, 3H), 1.28 (d, *J* = 6.8 Hz, 3H), 1.16 (s, 3H), 0.98 (d, *J* = 6.7 Hz, 3H), 0.51 (t, *J* = 7.4 Hz, 3H), 0.24 (t, *J* = 7.3 Hz, 3H).

**<sup>13</sup>C NMR** (126 MHz, C<sub>6</sub>D<sub>6</sub>) δ 179.0, 154.0, 151.1, 146.2, 139.8, 139.0, 127.1, 126.1, 125.9, 125.8, 125.2, 123.8, 123.2, 120.3, 115.2, 77.4, 64.9, 53.8, 52.6, 32.6, 31.8, 29.0, 28.0, 27.0, 26.5, 25.6, 25.2, 25.2, 9.3, 9.1.

**HRMS:** m/z calculated for C<sub>35</sub>H<sub>45</sub>ON<sub>2</sub> [M+H]<sup>+</sup> 509.35264 found 509.35014.

**Mp:** 143 °C.

**IR:** 1703 (s, ν<sub>CO</sub>) cm<sup>-1</sup>.

## Electrochemical studies

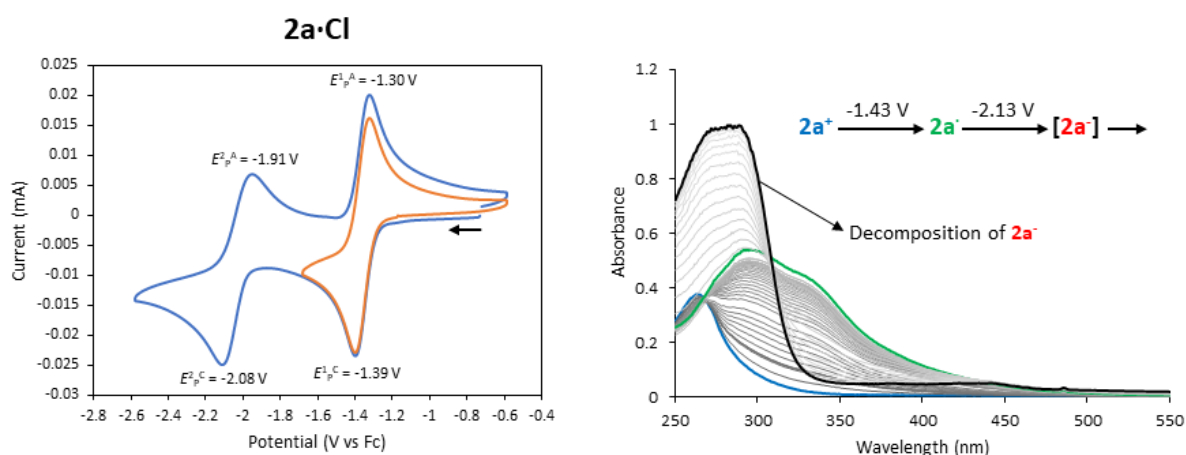

**Figure S1:** Left: Cyclic voltammogram of compound **2aCl** (1 mM solution employing 0.1 M of  ${}^t\text{Bu}_4\text{NPF}_6$  in acetonitrile electrolyte; 100 mV/s rate). Right: UV-vis monitoring of consecutive electrochemical reductions at given potentials on a reticulated vitreous carbon electrode.

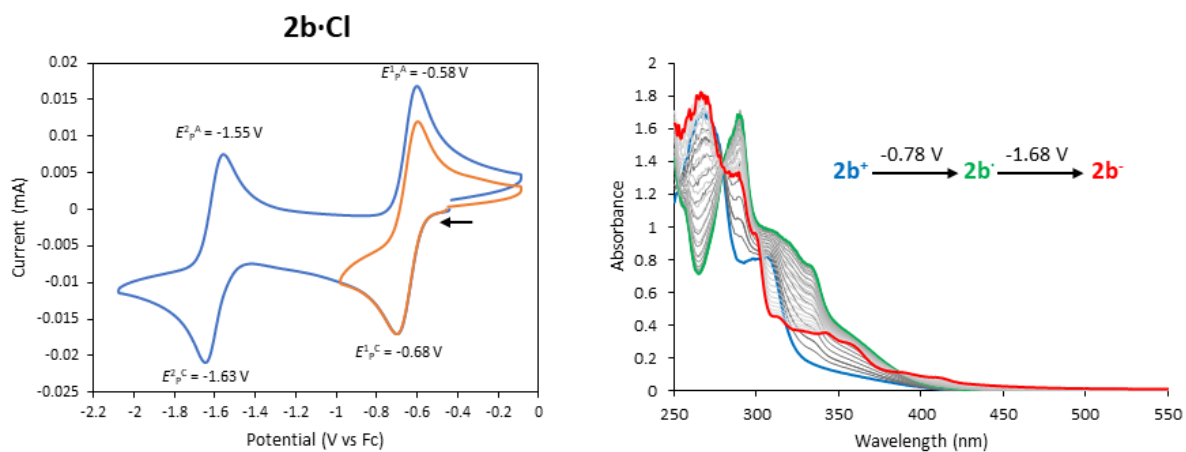

**Figure S2:** Left: Cyclic voltammogram of compound **2bCl** (1 mM solution employing 0.1 M of  ${}^t\text{Bu}_4\text{NPF}_6$  in acetonitrile electrolyte; 100 mV/s rate). Right: UV-vis monitoring of consecutive electrochemical reductions at given potentials on a reticulated vitreous carbon electrode.

## Monitoring of the decay of radical $2b^{\cdot}$ in technical ethanol at 60°

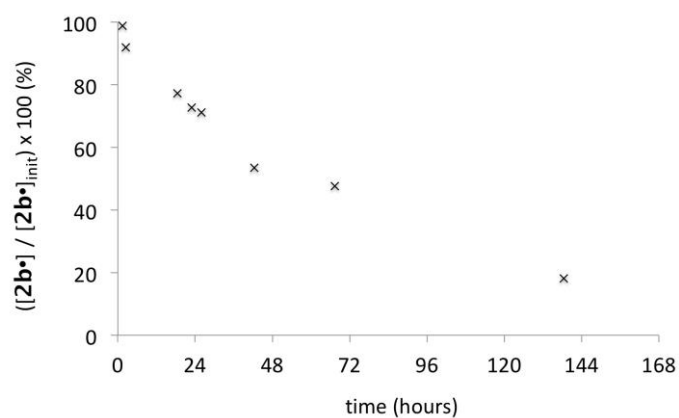

**Figure S3:** Decay of radical  $2b^{\cdot}$  in an aerated solution of technical ethanol at 60 °C, according to EPR monitoring.

## X-ray diffraction studies

Single crystals of **2a**<sup>•</sup> were grown from a saturated solution of pentane at -36 °C. Crystals of **2bCl** were grown by the slow diffusion of diethyl ether into a saturated solution of dichloromethane. Crystals of **2b**<sup>•</sup> were grown by the slow evaporation of a saturated solution of diethyl ether. Crystals of **3** were grown from the slow diffusion of pentane into a saturated solution of benzene. Crystals of **4** were grown from the slow evaporation of a saturated solution of THF.

The X-Ray structure of **2a**<sup>•</sup> was collected on a Bruker diffractometer fitted with Photon 3 detector using Mo-K $\alpha$  radiation ( $\lambda = 0.71073$  Å). A crystal was selected under Paratone oil, mounted on nylon loops then immediately placed in a cold stream of N<sub>2</sub> at 100K. The space group was determined from systematic absences. The structure was solved by intrinsic phasing method using ShelXT software, in Olex1.2 environment.<sup>5,6</sup> All non-hydrogen atoms were refined anisotropically, all CH hydrogens were placed in calculated positions with isotropic U values 1.2 times greater than U(eq) value of corresponding non-hydrogen atom.

For structures **2bCl**, **2b**<sup>•</sup> and **4** diffraction data were collected using a Rigaku XCallibur S Kappa area detector four-circle diffractometer (Mo-K $\alpha$  radiation  $\lambda = 0.71073$  Å, graphite monochromator), controlled by the Rigaku CrysAlis CCD software.<sup>7</sup> Unique intensities with  $I > 10\sigma(I)$  detected on all frames using the Rigaku CrysAlis RED were used to refine the values of the cell parameters. The substantial redundancy in data allows analytical absorption corrections to be applied using crystal shape determination for all compounds. The space group was determined from systematic absences, and it was confirmed by the successful resolution of the structure. The structures were solved by intrinsic phasing method using ShelXT software, in Olex1.2 environment.<sup>5,6</sup> All the atoms were found by difference Fourier syntheses. All non-hydrogen atoms were anisotropically refined on  $F^2$  using ShelXL program.<sup>8</sup> Hydrogen atoms were fixed in ideal positions for compounds **2bCl** and **2b**<sup>•</sup> and found by Fourier transform and refined isotropically with a riding model for compound **4**.

Crystals of compound **3** was selected, damped in a paraffin mixture, mounted on a nylon cryo-loop then centred on a Bruker-AXS-Enraf-Nonius KappaAPEXII goniometer equipped with a high brilliance micro-source at Mo K $\alpha$  radiation ( $\lambda = 0.71073$  Å) at 200 K. The data was collected with an APEXII 2D detector, then integrated and corrected for Lorentz and polarization effects using the EVAL14<sup>9</sup> software. Final cell parameters were obtained post-refining the whole data. The data was then reintegrated and corrected for absorption using the SADABS<sup>10</sup> program and finally merged with the software XPREP.<sup>11</sup> The structure was solved by direct methods and refined by full-matrix least square methods with respectively, the SHELXT-2016 and SHELXL-2013 programs<sup>12</sup> implemented in Olex2 software.<sup>6</sup> C, N, O atoms were refined with anisotropic thermal parameters. H atoms were set geometrically, riding on the carrier atoms, with isotropic thermal parameters.

CCDC 2191398, 2191542-2191545 contain the supplementary crystallographic data for this paper. These data can be obtained free of charge from the Cambridge Crystallographic Data Center via [www.ccdc.cam.ac.uk/datarequest/cif](http://www.ccdc.cam.ac.uk/datarequest/cif).

**Table S1.** Crystal data for **2a**<sup>•</sup> and **2bCl**.

|                                             | <b>2a</b> <sup>•</sup>                                        | <b>2bCl</b>                                                          |
|---------------------------------------------|---------------------------------------------------------------|----------------------------------------------------------------------|
| CCDC                                        | 2191398                                                       | 2191543                                                              |
| Empirical formula                           | C <sub>25</sub> H <sub>41</sub> N <sub>2</sub> O              | C <sub>37</sub> H <sub>48.5</sub> ClN <sub>2</sub> O <sub>1.75</sub> |
| Formula weight                              | 385.60                                                        | 584.73                                                               |
| Temperature/K                               | 273.15                                                        | 150.05(10)                                                           |
| Crystal system                              | triclinic                                                     | monoclinic                                                           |
| Space group                                 | P-1                                                           | P2 <sub>1</sub> /c                                                   |
| a/Å                                         | 9.3426(7)                                                     | 17.5309(4)                                                           |
| b/Å                                         | 13.6019(9)                                                    | 14.9228(3)                                                           |
| c/Å                                         | 19.5752(13)                                                   | 25.1286(5)                                                           |
| $\alpha$ /°                                 | 75.524(2)                                                     | 90                                                                   |
| $\beta$ /°                                  | 76.840(2)                                                     | 95.6541(18)                                                          |
| $\gamma$ /°                                 | 89.604(2)                                                     | 90                                                                   |
| Volume/Å <sup>3</sup>                       | 2342.0(3)                                                     | 6542.0(2)                                                            |
| Z                                           | 4                                                             | 8                                                                    |
| $\rho_{\text{calc}}$ /cm <sup>3</sup>       | 1.094                                                         | 1.187                                                                |
| $\mu$ /mm <sup>-1</sup>                     | 0.066                                                         | 0.150                                                                |
| F(000)                                      | 852.0                                                         | 2524.0                                                               |
| Crystal size/mm <sup>3</sup>                | 0.22 × 0.15 × 0.125                                           | 0.368 × 0.36 × 0.079                                                 |
| Radiation                                   | MoK $\alpha$ ( $\lambda = 0.71073$ )                          | Mo K $\alpha$ ( $\lambda = 0.71073$ )                                |
| 2 $\theta$ range for data collection/°      | 4.238 to 50.91                                                | 3.848 to 52.744                                                      |
| Index ranges                                | -11 ≤ h ≤ 11, -16 ≤ k ≤ 16, -23 ≤ l ≤ 23                      | -21 ≤ h ≤ 21, -18 ≤ k ≤ 18, -31 ≤ l ≤ 31                             |
| Reflections collected                       | 16889                                                         | 107550                                                               |
| Independent reflections                     | 8638 [R <sub>int</sub> = 0.0534, R <sub>sigma</sub> = 0.0907] | 13377 [R <sub>int</sub> = 0.0665, R <sub>sigma</sub> = 0.0407]       |
| Data/restraints/parameters                  | 8638/0/525                                                    | 13377/100/803                                                        |
| Goodness-of-fit on F <sup>2</sup>           | 0.979                                                         | 1.099                                                                |
| Final R indexes [I > 2 $\sigma$ (I)]        | R <sub>1</sub> = 0.0626, wR <sub>2</sub> = 0.1315             | R <sub>1</sub> = 0.0965, wR <sub>2</sub> = 0.2468                    |
| Final R indexes [all data]                  | R <sub>1</sub> = 0.1265, wR <sub>2</sub> = 0.1566             | R <sub>1</sub> = 0.1207, wR <sub>2</sub> = 0.2620                    |
| Largest diff. peak/hole / e Å <sup>-3</sup> | 0.23/-0.22                                                    | 1.02/-0.98                                                           |

<sup>a</sup>  $R_1 = \sum(|F_o| - |F_c|) / \sum |F_o|$ ;  $wR_2 = \{\sum [w(F_o^2 - F_c^2)^2] / \sum [w(F_o^2)^2]\}^{1/2}$ .

**Table S2.** Crystal data for **2b\*** and **3**.

|                                             | <b>2b*</b>                                                    | <b>3</b>                                                      |
|---------------------------------------------|---------------------------------------------------------------|---------------------------------------------------------------|
| CCDC                                        | 2191544                                                       | 2191542                                                       |
| Empirical formula                           | C <sub>35</sub> H <sub>43</sub> N <sub>2</sub> O              | C <sub>35</sub> H <sub>44</sub> N <sub>2</sub> O              |
| Formula weight                              | 507.71                                                        | 508.72                                                        |
| Temperature/K                               | 150.00(10)                                                    | 200                                                           |
| Crystal system                              | monoclinic                                                    | triclinic                                                     |
| Space group                                 | P2 <sub>1</sub> /c                                            | P-1                                                           |
| a/Å                                         | 17.8022(15)                                                   | 10.721(2)                                                     |
| b/Å                                         | 20.9612(13)                                                   | 10.918(2)                                                     |
| c/Å                                         | 7.8163(6)                                                     | 13.573(3)                                                     |
| α/°                                         | 90                                                            | 76.14(3)                                                      |
| β/°                                         | 96.965(9)                                                     | 83.20(3)                                                      |
| γ/°                                         | 90                                                            | 69.57(3)                                                      |
| Volume/Å <sup>3</sup>                       | 2895.2(4)                                                     | 1444.4(6)                                                     |
| Z                                           | 4                                                             | 2                                                             |
| ρ <sub>calc</sub> /cm <sup>3</sup>          | 1.165                                                         | 1.170                                                         |
| μ/mm <sup>-1</sup>                          | 0.069                                                         | 0.069                                                         |
| F(000)                                      | 1100.0                                                        | 552.0                                                         |
| Crystal size/mm <sup>3</sup>                | 0.231 × 0.21 × 0.082                                          | 0.3 × 0.25 × 0.25                                             |
| Radiation                                   | MoKα (λ = 0.71073)                                            | MoKα (λ = 0.71073)                                            |
| 2θ range for data collection/°              | 4.518 to 52.738                                               | 4.074 to 59.998                                               |
| Index ranges                                | -21 ≤ h ≤ 22, -26 ≤ k ≤ 15, -9 ≤ l ≤ 9                        | -15 ≤ h ≤ 15, -15 ≤ k ≤ 15, -19 ≤ l ≤ 19                      |
| Reflections collected                       | 12977                                                         | 31205                                                         |
| Independent reflections                     | 5917 [R <sub>int</sub> = 0.0633, R <sub>sigma</sub> = 0.1348] | 8388 [R <sub>int</sub> = 0.0246, R <sub>sigma</sub> = 0.0220] |
| Data/restraints/parameters                  | 5917/1044/619                                                 | 8388/0/353                                                    |
| Goodness-of-fit on F <sup>2</sup>           | 0.956                                                         | 1.065                                                         |
| Final R indexes [I ≥ 2σ (I)]                | R <sub>1</sub> = 0.0609, wR <sub>2</sub> = 0.0494             | R <sub>1</sub> = 0.0451, wR <sub>2</sub> = 0.1159             |
| Final R indexes [all data]                  | R <sub>1</sub> = 0.1898, wR <sub>2</sub> = 0.0715             | R <sub>1</sub> = 0.0573, wR <sub>2</sub> = 0.1283             |
| Largest diff. peak/hole / e Å <sup>-3</sup> | 0.15/-0.14                                                    | 0.34/-0.19                                                    |

$$^a R_1 = \Sigma(|F_o| - |F_c|) / \Sigma|F_o|; wR_2 = \{\Sigma[w(F_o^2 - F_c^2)^2] / \Sigma[w(F_o^2)^2]\}^{1/2}.$$

**Table S3.** Crystal data for **4**.

|                                             | <b>4</b>                                                      |
|---------------------------------------------|---------------------------------------------------------------|
| CCDC                                        | 2191545                                                       |
| Empirical formula                           | C <sub>17.5</sub> H <sub>22</sub> NO <sub>0.5</sub>           |
| Formula weight                              | 254.36                                                        |
| Temperature/K                               | 150.00(14)                                                    |
| Crystal system                              | monoclinic                                                    |
| Space group                                 | P2 <sub>1</sub> /c                                            |
| a/Å                                         | 15.9008(7)                                                    |
| b/Å                                         | 10.0800(3)                                                    |
| c/Å                                         | 18.4449(6)                                                    |
| α/°                                         | 90                                                            |
| β/°                                         | 101.381(4)                                                    |
| γ/°                                         | 90                                                            |
| Volume/Å <sup>3</sup>                       | 2898.21(19)                                                   |
| Z                                           | 8                                                             |
| ρ <sub>calc</sub> /cm <sup>3</sup>          | 1.166                                                         |
| μ/mm <sup>-1</sup>                          | 0.069                                                         |
| F(000)                                      | 1104.0                                                        |
| Crystal size/mm <sup>3</sup>                | 0.648 × 0.199 × 0.026                                         |
| Radiation                                   | Mo Kα (λ = 0.71073)                                           |
| 2θ range for data collection/°              | 4.506 to 61.014                                               |
| Index ranges                                | -22 ≤ h ≤ 22, -14 ≤ k ≤ 14, -26 ≤ l ≤ 26                      |
| Reflections collected                       | 29188                                                         |
| Independent reflections                     | 8836 [R <sub>int</sub> = 0.0791, R <sub>sigma</sub> = 0.1003] |
| Data/restraints/parameters                  | 8836/0/519                                                    |
| Goodness-of-fit on F <sup>2</sup>           | 1.007                                                         |
| Final R indexes [I ≥ 2σ (I)]                | R <sub>1</sub> = 0.0634, wR <sub>2</sub> = 0.1035             |
| Final R indexes [all data]                  | R <sub>1</sub> = 0.1377, wR <sub>2</sub> = 0.1291             |
| Largest diff. peak/hole / e Å <sup>-3</sup> | 0.22/-0.24                                                    |

$$^a R_1 = \Sigma(|F_o| - |F_c|) / \Sigma|F_o|; wR_2 = \{\Sigma[w(F_o^2 - F_c^2)^2] / \Sigma[w(F_o^2)^2]\}^{1/2}.$$



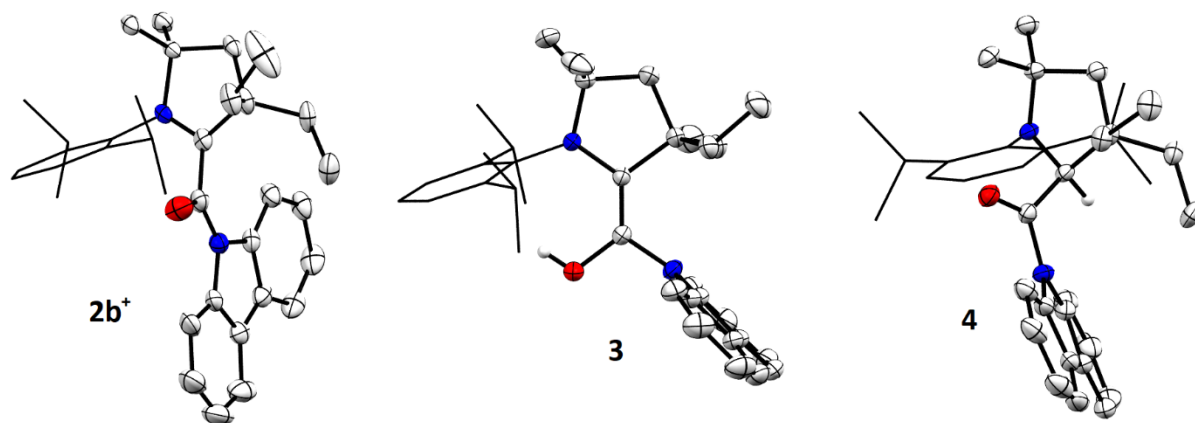

**Figure S4:** Solid state structures of **2b<sup>+</sup>**, **3** and **4**. Thermal ellipsoids are set at 50% probability. Molecules of solvent, counter anions, selected hydrogen atoms and ellipsoids on 2,6-diisopropylphenyl groups are omitted for clarity.

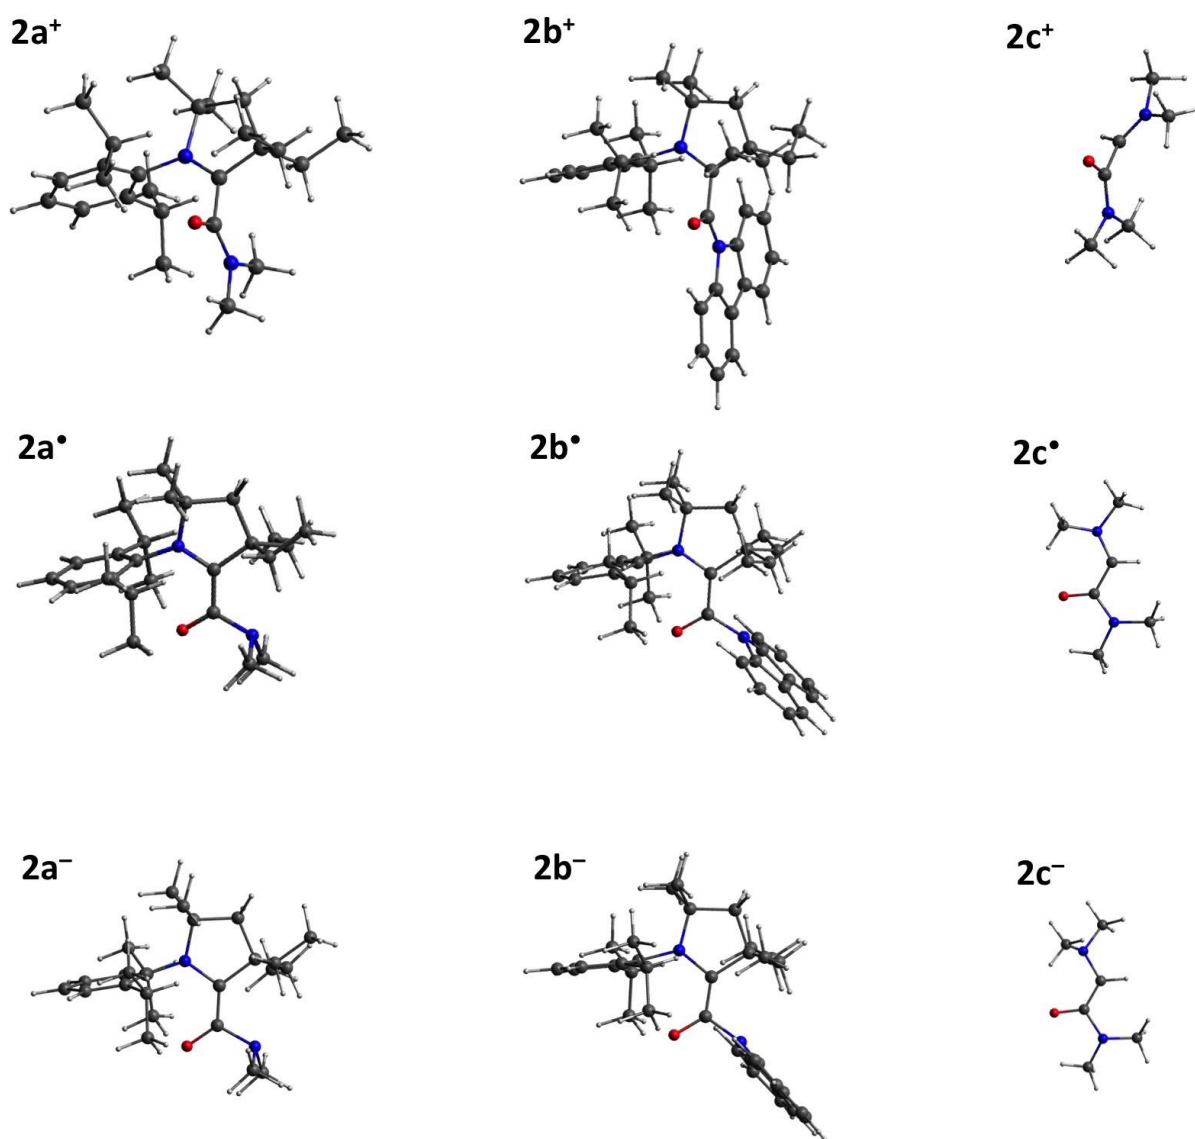

**Figure S5:** representation of optimized structures of **2a-c<sup>+</sup>**, **2a-c<sup>°</sup>** and **2a-c<sup>-</sup>**.

## DFT studies

**General considerations:** The DFT calculations were performed with the program package Gaussian09.<sup>13</sup> All optimized structures were submitted to vibrational analysis and minima were characterized by the absence of imaginary frequencies. E is the absolute electronic energy with zero point energy correction (in hartrees). When not otherwise stated, optimizations were performed at the B3LYP/6-311g(d,p) level of theory.

EPR hyperfine constants were calculated on previously optimized structures, with a single point calculation at the B3LYP/EPRII level of theory.

### xyz coordinates of optimized structure of 2a<sup>+</sup>

(E = -1161.556999)

|   | x           | y           | z           |   | x           | y           | z           |
|---|-------------|-------------|-------------|---|-------------|-------------|-------------|
| C | -1.04159400 | -0.02720400 | 0.16294200  | H | 1.38812600  | 4.17994400  | -2.11749100 |
| C | -2.35995200 | -0.40891000 | -0.50945000 | H | 1.97207900  | 2.64354900  | -2.76560200 |
| C | -1.86119700 | -0.98356700 | -1.85815000 | H | 2.99463400  | 3.59567100  | -1.69856300 |
| H | -1.88930900 | -2.07205400 | -1.83277700 | C | 1.51923000  | -2.55754300 | 0.42740100  |
| H | -2.48635700 | -0.66542800 | -2.69051800 | H | 0.46236000  | -2.53577700 | 0.15773300  |
| C | -0.40952300 | -0.51581400 | -2.06470200 | C | 1.60538000  | -2.97478200 | 1.91160400  |
| C | -3.16552600 | -1.44310700 | 0.34002400  | H | 2.64620200  | -3.08844000 | 2.22492700  |
| H | -4.11013400 | -1.59043600 | -0.18770700 | H | 1.11572600  | -3.94266300 | 2.04924800  |
| H | -3.42597200 | -0.96987900 | 1.29231600  | H | 1.12115500  | -2.25201800 | 2.56360800  |
| C | -3.24761100 | 0.86920800  | -0.69545300 | C | 2.21843800  | -3.63487900 | -0.43119700 |
| H | -3.50898300 | 1.25139100  | 0.29346800  | H | 2.28642400  | -3.36756800 | -1.48592100 |
| H | -2.65898700 | 1.64799600  | -1.18927500 | H | 1.67491600  | -4.57993000 | -0.35240700 |
| C | 0.47466200  | -1.60996200 | -2.65078800 | H | 3.23480000  | -3.81985600 | -0.07630900 |
| H | 1.52197600  | -1.30863300 | -2.69599300 | C | -0.92951200 | 0.18577500  | 1.66756800  |
| H | 0.13848200  | -1.79852300 | -3.67310500 | N | -0.00361600 | -0.15004300 | -0.60760700 |
| H | 0.39117400  | -2.54185500 | -2.09733000 | O | -0.64711700 | -0.84902800 | 2.25664100  |
| C | -0.31334500 | 0.73455400  | -2.94565000 | N | -1.20190400 | 1.36277800  | 2.26232900  |
| H | 0.71772100  | 1.06557000  | -3.05309900 | C | -1.17816900 | 1.41825500  | 3.72957300  |
| H | -0.91531700 | 1.56399600  | -2.57330500 | H | -0.45572500 | 2.16946800  | 4.05665300  |
| H | -0.68094900 | 0.47575200  | -3.94080300 | H | -2.16874000 | 1.69029700  | 4.10348000  |
| C | 1.41433300  | -0.00499900 | -0.21086300 | H | -0.89615100 | 0.44516700  | 4.12064900  |
| C | 2.05489000  | 1.25211900  | -0.32351400 | C | -1.61858100 | 2.59263100  | 1.59875500  |
| C | 3.42573100  | 1.30651400  | -0.05227000 | H | -2.67959600 | 2.78773400  | 1.77865500  |
| H | 3.93949300  | 2.25581900  | -0.13523500 | H | -1.04447900 | 3.42873800  | 1.99850000  |
| C | 4.13909000  | 0.18390300  | 0.33119000  | H | -1.44190500 | 2.54075600  | 0.52791500  |
| H | 5.20138300  | 0.25464100  | 0.53286100  | C | -4.54522200 | 0.67096300  | -1.48988700 |
| C | 3.48110200  | -1.02626600 | 0.47280700  | H | -5.03828000 | 1.63808600  | -1.61081000 |
| H | 4.03862600  | -1.89460400 | 0.79936500  | H | -4.36982900 | 0.27225700  | -2.49107900 |
| C | 2.11545900  | -1.16591400 | 0.20768400  | H | -5.25028300 | 0.01226000  | -0.98180000 |
| C | 1.37116400  | 2.58058800  | -0.64314500 | C | -2.54536900 | -2.81676500 | 0.61212200  |
| H | 0.31436000  | 2.39306200  | -0.84215300 | H | -2.35324800 | -3.37850200 | -0.30512800 |
| C | 1.46640600  | 3.53064500  | 0.57024600  | H | -1.62324200 | -2.74638000 | 1.18747600  |
| H | 2.49681200  | 3.85507900  | 0.72916500  | H | -3.25106600 | -3.41000900 | 1.19812400  |
| H | 1.13367700  | 3.04741300  | 1.49011100  |   |             |             |             |
| H | 0.86383200  | 4.42747800  | 0.40330800  |   |             |             |             |
| C | 1.96474300  | 3.28180700  | -1.88140200 |   |             |             |             |

xyz coordinates of optimized structure of 2a'  
(E = -1161.737922)

|   | x           | y           | z           |   | x           | y           | z           |
|---|-------------|-------------|-------------|---|-------------|-------------|-------------|
| C | -0.98865300 | -0.07986600 | 0.05843900  | C | 1.72913600  | 3.76005800  | -0.96601600 |
| C | -2.19130600 | -0.29996100 | -0.86564400 | H | 1.03375900  | 4.60412700  | -1.00094500 |
| C | -1.50855800 | -0.67526500 | -2.20741700 | H | 1.87573700  | 3.40303400  | -1.98721600 |
| H | -1.54473100 | -1.75628200 | -2.35207100 | H | 2.68751800  | 4.14636900  | -0.60894500 |
| H | -2.01369900 | -0.22689400 | -3.06362800 | C | 1.75597600  | -2.44317300 | 0.26090500  |
| C | -0.03645700 | -0.22592600 | -2.14248600 | H | 0.75102100  | -2.43109000 | -0.16218300 |
| C | -3.12924100 | -1.44591200 | -0.39029000 | C | 1.61876500  | -2.84980900 | 1.74395000  |
| H | -3.85924600 | -1.62585100 | -1.18689200 | H | 2.60335900  | -2.94137100 | 2.21266900  |
| H | -3.68362800 | -1.08283600 | 0.47647000  | H | 1.11804000  | -3.82000500 | 1.82639900  |
| C | -3.01874000 | 1.01642000  | -0.98903800 | H | 1.04829700  | -2.10492900 | 2.29940700  |
| H | -3.38191000 | 1.26410100  | 0.00882400  | C | 2.58074000  | -3.49355400 | -0.50462800 |
| H | -2.34542300 | 1.82624900  | -1.28800900 | H | 2.72814600  | -3.21993500 | -1.55157700 |
| C | 0.88756600  | -1.26452300 | -2.79058700 | H | 2.07403800  | -4.46283200 | -0.47477100 |
| H | 1.93894400  | -0.98755400 | -2.69383200 | H | 3.56819700  | -3.63305500 | -0.05642200 |
| H | 0.65267100  | -1.32543400 | -3.85666200 | C | -1.00535900 | 0.07474500  | 1.48301700  |
| H | 0.74477000  | -2.25461600 | -2.35930400 | N | 0.18535900  | -0.10411400 | -0.65587500 |
| C | 0.18598300  | 1.11848100  | -2.85814500 | O | 0.01612300  | 0.04873000  | 2.18747000  |
| H | 1.22089800  | 1.44696100  | -2.75582500 | N | -2.31498300 | 0.26315100  | 2.09768300  |
| H | -0.46793200 | 1.90352400  | -2.47777300 | C | -2.49323100 | -0.62901900 | 3.25094300  |
| H | -0.02149200 | 0.99424200  | -3.92444200 | H | -1.76477800 | -0.43867300 | 4.05045300  |
| C | 1.52637200  | 0.09912500  | -0.13715800 | H | -3.50186900 | -0.49028900 | 3.64904100  |
| C | 2.04470600  | 1.40547800  | 0.01090200  | H | -2.39329200 | -1.66894900 | 2.93419900  |
| C | 3.39525300  | 1.54809400  | 0.34492100  | C | -2.49222400 | 1.66104400  | 2.51603600  |
| H | 3.80965600  | 2.54313100  | 0.45887000  | H | -3.51062500 | 1.79770800  | 2.89043000  |
| C | 4.20929500  | 0.44678800  | 0.56073000  | H | -1.78598700 | 1.95349500  | 3.30786500  |
| H | 5.25535900  | 0.58176900  | 0.81312000  | H | -2.34852600 | 2.33106700  | 1.66653700  |
| C | 3.66498300  | -0.82762000 | 0.49355900  | C | -4.21545900 | 0.98593900  | -1.94947600 |
| H | 4.28927200  | -1.68339300 | 0.72223100  | H | -4.67735600 | 1.97617500  | -1.99435500 |
| C | 2.32330000  | -1.02976100 | 0.16158400  | H | -3.93140600 | 0.71658100  | -2.97063200 |
| C | 1.18088700  | 2.66323700  | -0.03548300 | H | -4.98556100 | 0.28454900  | -1.62167900 |
| H | 0.19190800  | 2.38129000  | -0.39694200 | C | -2.45959600 | -2.77704900 | -0.03382800 |
| C | 1.00288100  | 3.22431800  | 1.39250000  | H | -1.93852400 | -3.22646700 | -0.88420400 |
| H | 1.95101600  | 3.61147200  | 1.77761900  | H | -1.73407700 | -2.66414400 | 0.77488100  |
| H | 0.65381600  | 2.45066400  | 2.07671600  | H | -3.21301900 | -3.49785900 | 0.29576200  |
| H | 0.28293000  | 4.04911700  | 1.39066700  |   |             |             |             |

**xyz coordinates of optimized structure of 2a<sup>-</sup>**  
(E = -1161.774663)

|   | x           | y           | z           |   | x           | y           | z           |
|---|-------------|-------------|-------------|---|-------------|-------------|-------------|
| O | 0.01682700  | 0.23031900  | 2.22489100  | H | 3.66837800  | -1.09717600 | 0.47006000  |
| N | -0.23257500 | -0.21056800 | -0.65940500 | C | 2.54268000  | -0.67385800 | 3.15056900  |
| N | 2.37851700  | 0.29189800  | 2.06304300  | H | 1.77033300  | -0.56276800 | 3.92735300  |
| C | -2.39816300 | -1.00953500 | 0.15023200  | H | 3.53118400  | -0.54698200 | 3.60976500  |
| C | -3.74702100 | -0.77626700 | 0.42872800  | H | 2.47983300  | -1.69055900 | 2.75458000  |
| H | -4.39851700 | -1.61395100 | 0.65659100  | C | 1.47247500  | -0.72207600 | -2.19001300 |
| C | 1.01535400  | -0.05091500 | 0.08502600  | H | 1.96746100  | -0.30945800 | -3.07369300 |
| C | -3.40457500 | 1.58708500  | 0.25226600  | H | 1.49358500  | -1.80866900 | -2.30110700 |
| H | -3.79216800 | 2.59711700  | 0.34201000  | C | 4.23833700  | 0.89889800  | -2.02266100 |
| C | -1.82548200 | -2.40790800 | 0.34410500  | H | 5.00903300  | 0.20670800  | -1.67312000 |
| H | -0.84208400 | -2.40595000 | -0.12612400 | H | 4.70770600  | 1.88445800  | -2.12009600 |
| C | -4.26220100 | 0.51340800  | 0.44957800  | H | 3.94211000  | 0.58220300  | -3.02839400 |
| H | -5.31491300 | 0.68226600  | 0.65719200  | C | 2.44751800  | -2.79165500 | -0.03765500 |
| C | -2.04705600 | 1.39947600  | -0.03051600 | H | 3.17498900  | -3.48825700 | 0.39406300  |
| C | -0.00037600 | -0.26419200 | -2.11628700 | H | 2.00309600  | -3.28852700 | -0.90645400 |
| C | -1.13419200 | 2.62140100  | -0.03795300 | H | 1.65343400  | -2.62638300 | 0.69303700  |
| H | -0.15094300 | 2.29111800  | -0.37088300 | C | -1.54475000 | 0.08035700  | -0.16172200 |
| C | 2.18370500  | -0.31595600 | -0.86827300 | C | 1.02567500  | 0.14401900  | 1.44294400  |
| C | 2.53494800  | 1.64510600  | 2.59728300  | C | -1.60435100 | -2.64894400 | 1.85212600  |
| H | 2.43750900  | 2.37166500  | 1.78673500  | H | -1.01546200 | -1.82861900 | 2.27455000  |
| H | 3.53267100  | 1.75584200  | 3.04143400  | H | -1.08097600 | -3.59880300 | 2.01695900  |
| H | 1.78081700  | 1.88609100  | 3.36457400  | H | -2.56332600 | -2.69519800 | 2.38221400  |
| C | 3.04545500  | 0.97140700  | -1.05417100 | C | -0.96325000 | 3.13581200  | 1.40784900  |
| H | 2.38191800  | 1.78232300  | -1.37020300 | H | -1.90731200 | 3.54318300  | 1.78940700  |
| H | 3.41071900  | 1.24150100  | -0.06127600 | H | -0.21477200 | 3.93674100  | 1.44020200  |
| C | -1.61099900 | 3.75919300  | -0.95866300 | H | -0.64363000 | 2.31195900  | 2.05135400  |
| H | -1.74357500 | 3.42968500  | -1.99201400 | C | -2.66272200 | -3.53072200 | -0.28763000 |
| H | -0.87903000 | 4.57443700  | -0.95668400 | H | -3.64496600 | -3.62663000 | 0.18748200  |
| H | -2.56255800 | 4.18032600  | -0.61794700 | H | -2.15317100 | -4.49341000 | -0.16953200 |
| C | -0.91867900 | -1.28620400 | -2.81470800 | H | -2.82523500 | -3.36286600 | -1.35647000 |
| H | -1.97082800 | -1.00602100 | -2.71793100 | C | -0.18880100 | 1.08806200  | -2.84978900 |
| H | -0.78937000 | -2.28266000 | -2.38909000 | H | 0.05093000  | 0.97569400  | -3.91370400 |
| H | -0.67916400 | -1.33581300 | -3.88275000 | H | 0.45769800  | 1.86449900  | -2.43975400 |
| C | 3.12620000  | -1.46711800 | -0.40273100 | H | -1.22443300 | 1.42631200  | -2.77460000 |
| H | 3.86844700  | -1.66052700 | -1.18994100 |   |             |             |             |

xyz coordinates of optimized structure of 2b<sup>+</sup>  
(E = -1543.824991)

|   | x           | y           | z           |   | x           | y           | z           |
|---|-------------|-------------|-------------|---|-------------|-------------|-------------|
| O | 0.07101400  | -1.91291200 | 0.95752300  | H | 0.03518500  | 3.50690200  | 1.66540300  |
| N | -1.59688000 | 0.46911600  | 0.26842200  | H | 1.23684800  | 3.72193700  | 2.92871800  |
| C | -0.58317800 | 0.24929700  | 1.05375500  | H | -0.46826100 | 3.69447200  | 3.34251200  |
| N | 1.76600100  | -0.53280700 | 0.32665800  | C | -4.05720100 | 0.75973200  | 0.86697900  |
| C | -0.75691300 | 0.78712900  | 2.47582000  | H | -4.38750700 | 0.62144500  | -0.16265100 |
| C | -2.14642800 | 1.47124800  | 2.39417300  | H | -4.75262500 | 1.45054600  | 1.34940500  |
| H | -2.84694200 | 0.97764000  | 3.06587700  | H | -4.11237100 | -0.18957100 | 1.39469700  |
| H | -2.09320200 | 2.51214200  | 2.70270400  | C | -2.68920500 | 2.73920800  | 0.23961000  |
| C | -2.66512000 | 1.37993500  | 0.94060300  | H | -1.71834300 | 3.23439600  | 0.24632900  |
| C | 0.48696400  | -0.78969300 | 0.72677600  | H | -3.39488800 | 3.38059600  | 0.77198400  |
| C | 2.72682500  | -1.59519600 | 0.13695200  | H | -3.03681000 | 2.64817700  | -0.78801900 |
| C | 2.58110600  | -2.97499700 | 0.26165300  | C | -1.82958300 | -0.08917200 | -1.09366100 |
| H | 1.64580900  | -3.42560200 | 0.54593100  | C | -1.44478600 | 0.65347200  | -2.23880000 |
| C | 3.70338500  | -3.76457300 | 0.01001900  | C | -1.81952100 | 0.15619500  | -3.49155500 |
| H | 3.61325900  | -4.84037600 | 0.10053200  | H | -1.53477900 | 0.70928100  | -4.37698300 |
| C | 4.93042000  | -3.20351400 | -0.35181900 | C | -2.52788400 | -1.02304500 | -3.63235300 |
| H | 5.78090200  | -3.84746900 | -0.53972500 | H | -2.80780700 | -1.38015800 | -4.61634400 |
| C | 5.06604000  | -1.82490100 | -0.47043000 | C | -2.85781000 | -1.75176700 | -2.50350300 |
| H | 6.01636900  | -1.38522900 | -0.74846600 | H | -3.38783000 | -2.68846200 | -2.61646000 |
| C | 3.95707000  | -1.01801100 | -0.22401900 | C | -2.53084800 | -1.32033300 | -1.21454200 |
| C | 3.78270000  | 0.42145500  | -0.26144000 | C | -0.58051700 | 1.91238700  | -2.25758000 |
| C | 4.66685700  | 1.46035400  | -0.54985900 | H | -0.37937300 | 2.21656700  | -1.23133900 |
| H | 5.69776400  | 1.24688700  | -0.80507900 | C | 0.77270000  | 1.61096800  | -2.93776900 |
| C | 4.20808200  | 2.77209100  | -0.50312600 | H | 1.27657200  | 0.75441200  | -2.48860400 |
| H | 4.88424100  | 3.58952900  | -0.72153900 | H | 1.43755200  | 2.47371800  | -2.86128100 |
| C | 2.87649500  | 3.04242200  | -0.17896100 | H | 0.63142200  | 1.39243100  | -3.99861600 |
| H | 2.52656500  | 4.06743700  | -0.15154500 | C | -2.94180500 | -2.25640900 | -0.07778700 |
| C | 1.98244400  | 2.01136000  | 0.10535600  | H | -2.65337600 | -1.80311400 | 0.86790200  |
| H | 0.95711600  | 2.24883700  | 0.33236200  | C | -2.20677700 | -3.61053800 | -0.18516600 |
| C | 2.44527300  | 0.70532600  | 0.06869100  | H | -2.54961500 | -4.17310400 | -1.05700600 |
| C | -0.75351800 | -0.38620400 | 3.53071100  | H | -2.41901900 | -4.21732400 | 0.69933300  |
| H | -0.87700800 | 0.13065100  | 4.48703700  | H | -1.12941300 | -3.48271100 | -0.25949500 |
| H | 0.24876000  | -0.82348700 | 3.55210400  | C | -4.46262200 | -2.52326200 | -0.04553200 |
| C | -1.79383200 | -1.50202700 | 3.45010900  | H | -5.05880800 | -1.61110700 | -0.04739600 |
| H | -1.62067100 | -2.16470100 | 2.60588700  | H | -4.71724200 | -3.09394200 | 0.85145500  |
| H | -2.81783300 | -1.12217100 | 3.40653500  | H | -4.77648800 | -3.12031200 | -0.90461300 |
| H | -1.72400100 | -2.10501300 | 4.35876400  | C | -1.25282200 | 3.10157800  | -2.97360000 |
| C | 0.41302000  | 1.73340200  | 2.93970900  | H | -1.37449000 | 2.90503500  | -4.04089200 |
| H | 0.50932600  | 1.59200400  | 4.01799800  | H | -0.62682300 | 3.99264300  | -2.87928500 |
| H | 1.35182700  | 1.36606000  | 2.52279800  | H | -2.23795400 | 3.33819100  | -2.57002300 |
| C | 0.28465300  | 3.24126300  | 2.69447500  |   |             |             |             |

xyz coordinates of optimized structure of 2b'  
(E = -1544.031898)

|   | x           | y           | z           |   | x           | y           | z           |
|---|-------------|-------------|-------------|---|-------------|-------------|-------------|
| O | -0.05779300 | -0.00026900 | -1.58510400 | H | -0.04231800 | -2.79213200 | 1.39112700  |
| N | 1.66486200  | 0.00013300  | 0.66625800  | H | -1.12247300 | -3.40312700 | 2.63611700  |
| C | 0.29687800  | 0.00010100  | 0.75018100  | H | 0.46292300  | -2.78671700 | 3.08272700  |
| N | -1.96725400 | -0.00015000 | -0.27598900 | C | 3.23936900  | 1.24326700  | 2.19395200  |
| C | -0.16368100 | 0.00009300  | 2.21482400  | H | 4.04472900  | 1.27088000  | 1.45868900  |
| C | 1.17332200  | 0.00019200  | 3.00771400  | H | 3.69383800  | 1.20720400  | 3.18761600  |
| H | 1.23305500  | 0.87257100  | 3.65832600  | H | 2.66401600  | 2.16557600  | 2.12042300  |
| H | 1.23330100  | -0.87230800 | 3.65814200  | C | 3.24014700  | -1.24173500 | 2.19419800  |
| C | 2.35565800  | 0.00046800  | 2.01165400  | H | 2.66539400  | -2.16442800 | 2.12077600  |
| C | -0.51068700 | -0.00009100 | -0.43393400 | H | 3.69453100  | -1.20522100 | 3.18788600  |
| C | -2.77554400 | 1.12957900  | -0.45532800 | H | 4.04557400  | -1.26893800 | 1.45899700  |
| C | -2.42005100 | 2.47739700  | -0.50579200 | C | 2.48041300  | 0.00010000  | -0.54368000 |
| H | -1.38606200 | 2.78836200  | -0.44720400 | C | 2.90146600  | -1.22696800 | -1.10547900 |
| C | -3.43438900 | 3.41625900  | -0.66272800 | C | 3.83494700  | -1.19630600 | -2.14520300 |
| H | -3.17656800 | 4.46840600  | -0.71050400 | H | 4.16857100  | -2.13024700 | -2.58172300 |
| C | -4.77812900 | 3.02963700  | -0.77088500 | C | 4.32257700  | 0.00020800  | -2.64770200 |
| H | -5.54530900 | 3.78598600  | -0.88945200 | H | 5.05182900  | 0.00025600  | -3.45020600 |
| C | -5.12745900 | 1.68525600  | -0.74684300 | C | 3.83441600  | 1.19664400  | -2.14554200 |
| H | -6.16421100 | 1.38524900  | -0.85339200 | H | 4.16761700  | 2.13061100  | -2.58232700 |
| C | -4.12454200 | 0.72272000  | -0.60206500 | C | 2.90091500  | 1.22717800  | -1.10582700 |
| C | -4.12442500 | -0.72335900 | -0.60209200 | C | 2.29478200  | -2.57639300 | -0.73188700 |
| C | -5.12718900 | -1.68605400 | -0.74688100 | H | 1.67834800  | -2.43395500 | 0.15542600  |
| H | -6.16399200 | -1.38621300 | -0.85340900 | C | 1.36435100  | -3.06121600 | -1.86493700 |
| C | -4.77763900 | -3.03037700 | -0.77095700 | H | 0.62213800  | -2.30355000 | -2.11786900 |
| H | -5.54469500 | -3.78684900 | -0.88953200 | H | 0.84913800  | -3.98019700 | -1.56709600 |
| C | -3.43383400 | -3.41678300 | -0.66281800 | H | 1.93880800  | -3.28283000 | -2.76900500 |
| H | -3.17584300 | -4.46888700 | -0.71061900 | C | 2.29358800  | 2.57640600  | -0.73259100 |
| C | -2.41964700 | -2.47776100 | -0.50587200 | H | 1.67702800  | 2.43383300  | 0.15461500  |
| H | -1.38560400 | -2.78855900 | -0.44730600 | C | 1.36316900  | 3.06064400  | -1.86590300 |
| C | -2.77536400 | -1.13000300 | -0.45538100 | H | 1.93770400  | 3.28236600  | -2.76989400 |
| C | -1.02216000 | 1.24616200  | 2.59142200  | H | 0.84749000  | 3.97944500  | -1.56831100 |
| H | -1.29891500 | 1.12501700  | 3.64523900  | H | 0.62133100  | 2.30261900  | -2.11887300 |
| H | -1.95580100 | 1.20767600  | 2.02972800  | C | 3.33880700  | 3.65972300  | -0.40936100 |
| C | -0.38676500 | 2.62699100  | 2.41347000  | H | 4.02780700  | 3.34872000  | 0.37821600  |
| H | -0.04292800 | 2.79235700  | 1.39102500  | H | 2.83879900  | 4.57509500  | -0.07911100 |
| H | 0.46247500  | 2.78705900  | 3.08257700  | H | 3.93460900  | 3.91775500  | -1.28904200 |
| H | -1.12308500 | 3.40314200  | 2.63611200  | C | 3.34052900  | -3.65922600 | -0.40875300 |
| C | -1.02196600 | -1.24612200 | 2.59139800  | H | 3.93622400  | -3.91714300 | -1.28854100 |
| H | -1.29884200 | -1.12499400 | 3.64518500  | H | 2.84097900  | -4.57475800 | -0.07825200 |
| H | -1.95556100 | -1.20782400 | 2.02961000  | H | 4.02959600  | -3.34783500 | 0.37860800  |
| C | -0.38628700 | -2.62683300 | 2.41353600  |   |             |             |             |

xyz coordinates of optimized structure of 2b<sup>-</sup>  
(E = -1544.086344)

|   | x           | y           | z           |   | x           | y           | z           |
|---|-------------|-------------|-------------|---|-------------|-------------|-------------|
| O | -0.08304400 | 0.16352400  | -1.62367100 | H | -0.11305100 | -2.77886600 | 1.47177200  |
| N | 1.70877400  | 0.00887800  | 0.66493300  | H | -1.24951500 | -3.36759900 | 2.68609000  |
| C | 0.25433100  | -0.02765300 | 0.72807100  | H | 0.34512300  | -2.79797400 | 3.17747200  |
| N | -1.98838000 | 0.06604800  | -0.27353100 | C | 3.39791700  | 0.96339000  | 2.26176700  |
| C | -0.17074600 | -0.00822300 | 2.20205200  | H | 4.20735400  | 0.93835700  | 1.52830000  |
| C | 1.17842700  | -0.03678200 | 2.98139900  | H | 3.83876700  | 0.82185400  | 3.25481200  |
| H | 1.28753900  | 0.86989100  | 3.57964100  | H | 2.93597500  | 1.95117400  | 2.23280400  |
| H | 1.20425900  | -0.86922600 | 3.68798800  | C | 3.09338200  | -1.49728200 | 2.15879000  |
| C | 2.36001100  | -0.14591300 | 1.98407800  | H | 2.41280900  | -2.33976900 | 2.03837900  |
| C | -0.48594400 | 0.06921600  | -0.42489200 | H | 3.53297900  | -1.55677200 | 3.16094600  |
| C | -2.78201300 | 1.18744500  | -0.46530300 | H | 3.90277300  | -1.59874000 | 1.43218400  |
| C | -2.40965400 | 2.53402300  | -0.52834800 | C | 2.51569300  | -0.03708800 | -0.52342100 |
| H | -1.36836100 | 2.81696700  | -0.46651300 | C | 2.84353600  | -1.26248300 | -1.15632500 |
| C | -3.40705600 | 3.48517300  | -0.70093900 | C | 3.80916000  | -1.27647000 | -2.16772300 |
| H | -3.13186900 | 4.53368100  | -0.75691500 | H | 4.06520800  | -2.21793900 | -2.64263500 |
| C | -4.76009600 | 3.12101900  | -0.81561200 | C | 4.42701500  | -0.11001200 | -2.59615200 |
| H | -5.51454000 | 3.88992700  | -0.94602600 | H | 5.18230400  | -0.14211700 | -3.37571500 |
| C | -5.12993000 | 1.78229300  | -0.78182300 | C | 4.03039400  | 1.10305800  | -2.05046000 |
| H | -6.17194500 | 1.49717300  | -0.89158400 | H | 4.45781900  | 2.02378700  | -2.43405100 |
| C | -4.14294800 | 0.80452900  | -0.62112800 | C | 3.06931200  | 1.16326200  | -1.03758200 |
| C | -4.15781100 | -0.63816400 | -0.59981000 | C | 2.07671400  | -2.54777600 | -0.87095200 |
| C | -5.16448400 | -1.59936200 | -0.73422200 | H | 1.48070600  | -2.37065800 | 0.02331400  |
| H | -6.19994900 | -1.29553900 | -0.85532300 | C | 1.09300100  | -2.81984600 | -2.02906200 |
| C | -4.82359700 | -2.94639400 | -0.72782400 | H | 0.46074500  | -1.94399800 | -2.19549100 |
| H | -5.59409000 | -3.70246900 | -0.83770900 | H | 0.46351800  | -3.68818000 | -1.80134400 |
| C | -3.47934800 | -3.33544600 | -0.59610400 | H | 1.63724000  | -3.03779200 | -2.95501400 |
| H | -3.22619400 | -4.39079100 | -0.61686700 | C | 2.52725800  | 2.52387800  | -0.62050900 |
| C | -2.46289900 | -2.40048800 | -0.44711900 | H | 1.94771800  | 2.36418200  | 0.28748800  |
| H | -1.42901200 | -2.70307600 | -0.36244300 | C | 1.55108800  | 3.02702700  | -1.70435900 |
| C | -2.80443300 | -1.04465700 | -0.42964100 | H | 2.08566200  | 3.24699500  | -2.63558500 |
| C | -0.96897800 | 1.27302500  | 2.60213800  | H | 1.05593700  | 3.94938400  | -1.37731400 |
| H | -1.20281900 | 1.20320000  | 3.67445700  | H | 0.79888400  | 2.26059600  | -1.91269700 |
| H | -1.92795300 | 1.25343500  | 2.08091600  | C | 3.60931300  | 3.57343100  | -0.31863700 |
| C | -0.29010600 | 2.61805100  | 2.33467000  | H | 4.30886200  | 3.22898600  | 0.44803700  |
| H | 0.03967500  | 2.68463300  | 1.29707800  | H | 3.14546400  | 4.49928300  | 0.03849900  |
| H | 0.58211400  | 2.77990100  | 2.97553200  | H | 4.19066100  | 3.82827200  | -1.21085100 |
| H | -0.98771000 | 3.44092500  | 2.51876600  | C | 2.97192100  | -3.77420100 | -0.62111400 |
| C | -1.06624200 | -1.20797800 | 2.63729200  | H | 3.53770500  | -4.04999600 | -1.51674300 |
| H | -1.33543900 | -1.05732400 | 3.69258200  | H | 2.35687500  | -4.63914800 | -0.35025800 |
| H | -2.00138900 | -1.15513800 | 2.07756600  | H | 3.68801300  | -3.60375500 | 0.18648100  |
| C | -0.48172800 | -2.61400300 | 2.48539300  |   |             |             |             |

**xyz coordinates of optimized structure of C<sup>+</sup>**  
(E = -1296.743679)

|   | x           | y           | z           |   | x           | y           | z           |
|---|-------------|-------------|-------------|---|-------------|-------------|-------------|
| O | -0.44822700 | -0.07868900 | -2.31377400 | H | -5.10189700 | 1.49614900  | -0.40439000 |
| N | 0.52112600  | 0.69252900  | 0.48122300  | H | -5.38761500 | 2.98477300  | 0.47971000  |
| C | 0.37471000  | 1.81951700  | 1.54627300  | C | -2.34681000 | -3.66552200 | 0.23885700  |
| C | -2.50506600 | -4.43084000 | -0.91560300 | C | 4.33143900  | -0.96736800 | -0.45028000 |
| C | -2.07884900 | -3.94028800 | -2.15260500 | H | 5.31172800  | -1.36998100 | -0.67634800 |
| C | -0.95851400 | 2.44849800  | 1.10875700  | C | 3.54938300  | -1.54853800 | 0.53304000  |
| H | -1.51759900 | 2.80302000  | 1.97307300  | H | 3.92507300  | -2.41242100 | 1.06613000  |
| H | -0.76279900 | 3.31336300  | 0.47125900  | C | 2.59373700  | 0.68140000  | -0.88566800 |
| C | -0.76332700 | -0.56012500 | -1.24335700 | C | 1.50067100  | -1.81757600 | 1.92455000  |
| C | -1.50489600 | -2.68165100 | -2.23823600 | H | 0.52790000  | -1.34028700 | 2.05674400  |
| C | -1.34394100 | -1.90085200 | -1.07923000 | C | -1.73756700 | 1.37782100  | 0.29872700  |
| C | -4.01783100 | 1.62226400  | 1.45972300  | C | -2.85839000 | 0.67040500  | 1.12290800  |
| H | -3.67868700 | 2.40268400  | 2.14978300  | H | -2.44786700 | 0.24711400  | 2.04375300  |
| H | -4.78337300 | 1.05539600  | 1.99650400  | H | -3.25411000 | -0.16222100 | 0.53568400  |
| C | 0.29191200  | 1.19273500  | 2.94253800  | C | -2.38846900 | 1.98205400  | -0.98282700 |
| H | -0.50997400 | 0.45910300  | 3.02830300  | H | -2.79381600 | 1.17327300  | -1.59821100 |
| H | 1.23111700  | 0.72301200  | 3.22589600  | H | -1.62362000 | 2.47885100  | -1.58500000 |
| H | 0.09316900  | 1.99133600  | 3.66040300  | C | 3.84836700  | 0.12532900  | -1.15134900 |
| C | 1.82135600  | 0.07526100  | 0.13962700  | H | 4.45812600  | 0.56422700  | -1.93053400 |
| C | 1.53703800  | 2.80264800  | 1.50078100  | C | 3.16799300  | 3.06053100  | -1.59887900 |
| H | 2.49277800  | 2.31167600  | 1.69058600  | H | 3.36600800  | 3.33103100  | -0.56137200 |
| H | 1.58763500  | 3.33121900  | 0.55236600  | H | 4.12837000  | 2.82290500  | -2.06141600 |
| H | 1.38231900  | 3.54468400  | 2.28757400  | H | 2.77232300  | 3.94032500  | -2.11288000 |
| C | 2.18085400  | 1.88058800  | -1.74321300 | C | 2.07775500  | 1.50269200  | -3.23653600 |
| H | 1.19263800  | 2.22004400  | -1.42530200 | H | 3.05816100  | 1.23886100  | -3.64086900 |
| C | -0.61358300 | 0.42774100  | -0.08573700 | H | 1.39896100  | 0.66943000  | -3.40034900 |
| C | -1.76236800 | -2.40716400 | 0.15985800  | H | 1.70933200  | 2.35964700  | -3.80678900 |
| C | -3.52461600 | 2.95321700  | -0.63159500 | C | 1.25063900  | -3.27798600 | 1.49275600  |
| H | -3.94651700 | 3.34506400  | -1.56081300 | H | 2.18597200  | -3.84034500 | 1.45239600  |
| H | -3.12819900 | 3.81831900  | -0.08743300 | H | 0.60045400  | -3.77819400 | 2.21541900  |
| C | 2.22379500  | -1.80817500 | 3.28761700  | H | 0.78230100  | -3.34096600 | 0.51061100  |
| H | 3.14441000  | -2.39463600 | 3.24510800  | H | -1.17874800 | -2.27947000 | -3.18900900 |
| H | 2.49753800  | -0.80375000 | 3.61469000  | H | -2.20149400 | -4.54074500 | -3.04567600 |
| H | 1.58760200  | -2.25485600 | 4.05597500  | H | -2.95988500 | -5.41251400 | -0.85254300 |
| C | 2.28048700  | -1.05564000 | 0.85440500  | H | -2.67374800 | -4.05253500 | 1.19619000  |
| C | -4.61172900 | 2.26679100  | 0.20267900  | H | -1.63112400 | -1.82739400 | 1.06451900  |



xyz coordinates of optimized structure of D<sup>+</sup>  
(E = -1676.353283)

|   | x           | y           | z           |   | x           | y           | z           |
|---|-------------|-------------|-------------|---|-------------|-------------|-------------|
| F | 2.31882700  | -2.80748600 | -0.98444900 | C | -1.20890600 | 1.51939700  | -1.52383600 |
| F | 1.47447200  | 1.27865200  | 1.29589800  | C | 3.58763300  | 0.83690100  | 0.42441200  |
| F | 5.69870600  | 0.36879900  | -0.49066000 | C | -2.17607500 | 0.62167400  | -3.56720200 |
| F | 4.83080700  | -2.03170200 | -1.40175000 | H | -2.35064000 | 0.70704500  | -4.63320100 |
| F | 4.00471000  | 2.02327700  | 0.85240200  | C | -1.45373800 | 1.59535200  | -2.89860100 |
| O | 0.00180400  | -2.36422500 | 0.15883800  | H | -1.06289000 | 2.43908200  | -3.45292900 |
| N | -1.54373700 | 0.27432900  | 0.63445500  | C | -2.47591600 | -0.61162700 | -1.48871100 |
| C | -2.51792600 | 0.89937400  | 1.68591900  | C | -0.37892800 | 2.64430700  | -0.91041000 |
| C | 4.45323800  | -0.00524600 | -0.27083100 | H | -0.24435700 | 2.44328100  | 0.15005200  |
| C | 4.00215700  | -1.23693000 | -0.73906700 | C | -0.85011100 | -0.65171900 | 2.70495700  |
| C | -2.25907100 | -0.02752200 | 2.88699000  | C | 0.22615200  | 0.01716400  | 3.59123300  |
| H | -2.33712000 | 0.51772000  | 3.82756200  | H | 0.27436000  | 1.09680500  | 3.46197800  |
| H | -3.00779800 | -0.82175500 | 2.90270100  | H | 1.21764300  | -0.39910600 | 3.40348500  |
| C | 0.40591200  | -1.25983000 | 0.44684300  | C | -0.87130100 | -2.16463500 | 3.03072700  |
| C | 2.68924400  | -1.62912400 | -0.51238300 | H | 0.11715500  | -2.61736800 | 2.93884700  |
| C | 1.78642800  | -0.80045400 | 0.18996000  | H | -1.55954900 | -2.71598900 | 2.38961100  |
| C | -2.10063900 | 2.34547200  | 1.97689300  | C | -2.67259400 | -0.46403300 | -2.86492600 |
| H | -1.05505300 | 2.43065800  | 2.27293400  | H | -3.23254600 | -1.22350500 | -3.39493000 |
| H | -2.28098000 | 2.99719700  | 1.12522900  | C | -4.63468900 | -1.86490800 | -0.99414300 |
| H | -2.71417500 | 2.70951500  | 2.80388500  | H | -5.10587900 | -0.93683400 | -0.66946100 |
| C | -1.72878500 | 0.40144000  | -0.83027200 | H | -4.92038000 | -2.02516200 | -2.03612700 |
| C | -3.96125400 | 0.86479500  | 1.20330100  | H | -5.05913400 | -2.68708400 | -0.41237400 |
| H | -4.09163600 | 1.41899300  | 0.27243700  | C | -2.53051800 | -3.15847300 | -1.43761200 |
| H | -4.32224000 | -0.15188700 | 1.06842500  | H | -2.82898700 | -3.27214100 | -2.48240100 |
| H | -4.58387100 | 1.34123500  | 1.96409500  | H | -1.44521600 | -3.20163000 | -1.38360700 |
| C | -3.09697300 | -1.85199300 | -0.84075400 | H | -2.93129300 | -4.01538700 | -0.88997900 |
| H | -2.86189700 | -1.85176600 | 0.22594800  | C | 1.02571700  | 2.71531900  | -1.54587400 |
| C | -0.62873300 | -0.43470400 | 1.21103500  | H | 0.97907400  | 3.08218500  | -2.57361400 |
| C | 2.28447700  | 0.43108900  | 0.63959600  | H | 1.66192000  | 3.40126300  | -0.98090900 |
| C | -1.07526400 | 4.01365500  | -1.05121400 | H | 1.51041000  | 1.73784600  | -1.57475100 |
| H | -1.12673600 | 4.32295100  | -2.09762900 | H | -1.19729000 | -2.27935200 | 4.06715300  |
| H | -2.09753900 | 4.00523200  | -0.66749900 | H | -0.02252800 | -0.19040300 | 4.63397600  |
| H | -0.51404200 | 4.77954700  | -0.50994500 |   |             |             |             |

**xyz coordinates of optimized structure of C\***  
(E = -1296.936678)

|   | x           | y           | z           |   | x           | y           | z           |
|---|-------------|-------------|-------------|---|-------------|-------------|-------------|
| O | 0.22205500  | -1.97483000 | -0.59732100 | H | -4.80677500 | 1.73390900  | 0.21906800  |
| N | 0.87597200  | 0.68873000  | -0.00185800 | H | -4.82236400 | 3.49125100  | 0.18012400  |
| C | 0.95575400  | 2.17830400  | 0.20886300  | C | -4.02906500 | -2.58091000 | 0.85056800  |
| C | -4.57861000 | -3.03591900 | -0.34448000 | C | 4.55822300  | -1.38272300 | 0.34472000  |
| C | -3.87631000 | -2.85842500 | -1.53664600 | H | 5.52868200  | -1.85655500 | 0.44382800  |
| C | -0.44973700 | 2.62185500  | -0.22785200 | C | 3.71833900  | -1.27447700 | 1.44240400  |
| H | -0.77498700 | 3.49815700  | 0.33279400  | H | 4.03105100  | -1.69199400 | 2.39246400  |
| H | -0.41796200 | 2.91004500  | -1.28224800 | C | 2.88814100  | -0.29795100 | -1.04605700 |
| C | -0.69219200 | -1.15663600 | -0.35640800 | C | 1.53595400  | -0.72670700 | 2.55547300  |
| C | -2.63935500 | -2.22207600 | -1.53111100 | H | 0.66020100  | -0.11283500 | 2.34388900  |
| C | -2.09418300 | -1.72574400 | -0.34025100 | C | -1.40389900 | 1.40878000  | -0.06438200 |
| C | -3.19574100 | 2.63811100  | 1.33808300  | C | -2.19313700 | 1.47329100  | 1.27789400  |
| H | -2.66586300 | 3.59775700  | 1.35999300  | H | -1.50107600 | 1.53125900  | 2.12242300  |
| H | -3.75287800 | 2.57965100  | 2.27884000  | H | -2.74844900 | 0.54104700  | 1.39309000  |
| C | 1.25308700  | 2.52983900  | 1.67809500  | C | -2.42973700 | 1.38333200  | -1.22857800 |
| H | 0.51402500  | 2.11618100  | 2.36296800  | H | -3.01311800 | 0.46219800  | -1.17886100 |
| H | 2.23862600  | 2.16531000  | 1.97095400  | H | -1.89060700 | 1.36397400  | -2.18161100 |
| H | 1.25061700  | 3.61698400  | 1.79372000  | C | 4.12945100  | -0.91891800 | -0.89100500 |
| C | 2.08024500  | -0.11754900 | 0.09995300  | H | 4.76207000  | -1.06230800 | -1.75916500 |
| C | 2.03151700  | 2.84375700  | -0.65814700 | C | 3.42764400  | 0.84867000  | -3.27743600 |
| H | 3.03195500  | 2.48757800  | -0.40670000 | H | 3.73248700  | 1.76337000  | -2.76497400 |
| H | 1.85430200  | 2.67484000  | -1.71929100 | H | 4.33146800  | 0.27007700  | -3.48674000 |
| H | 2.00500400  | 3.92241100  | -0.48064200 | H | 2.99409800  | 1.12811300  | -4.24241300 |
| C | 2.41211800  | 0.03046800  | -2.45913500 | C | 2.05383800  | -1.27134000 | -3.20793500 |
| H | 1.49440800  | 0.61488300  | -2.37579900 | H | 2.94816400  | -1.87924500 | -3.37534400 |
| C | -0.41760100 | 0.23294700  | -0.11352700 | H | 1.34232000  | -1.86433800 | -2.63344300 |
| C | -2.79459700 | -1.93090300 | 0.85197600  | H | 1.62035300  | -1.03803200 | -4.18606600 |
| C | -3.39945400 | 2.57408600  | -1.18337300 | C | 1.03864300  | -2.17565000 | 2.75188200  |
| H | -4.10243600 | 2.49827300  | -2.01905400 | H | 1.86251300  | -2.83198700 | 3.04757800  |
| H | -2.85418100 | 3.51525300  | -1.32621200 | H | 0.28241500  | -2.21471300 | 3.54273800  |
| C | 2.17180900  | -0.20349800 | 3.85590600  | H | 0.60923900  | -2.57298100 | 1.83169800  |
| H | 3.01036000  | -0.82885300 | 4.17381400  | H | -2.08413400 | -2.10594100 | -2.45502500 |
| H | 2.54152100  | 0.81866000  | 3.75213500  | H | -4.28958800 | -3.22489800 | -2.47000200 |
| H | 1.43534800  | -0.21555800 | 4.66508400  | H | -5.53952200 | -3.53816000 | -0.34691600 |
| C | 2.46599200  | -0.65922700 | 1.34661000  | H | -4.55487400 | -2.73903700 | 1.78592800  |
| C | -4.16196900 | 2.61870000  | 0.14683100  | H | -2.36167100 | -1.60711600 | 1.79133800  |

xyz coordinates of optimized structure of D'  
(E = -1676.572070)

|   | x           | y           | z           |   | x           | y           | z           |
|---|-------------|-------------|-------------|---|-------------|-------------|-------------|
| F | -2.16743800 | 2.41342200  | -0.25542500 | C | 2.79517300  | -1.18580900 | -1.03910600 |
| F | -2.17546200 | -2.31798200 | -0.33644700 | C | -4.19921600 | -1.14791500 | -0.49587900 |
| F | -6.22029200 | 0.06051700  | -0.66542100 | C | 4.23603800  | 0.09391300  | -2.51928300 |
| F | -4.86200100 | 2.41659400  | -0.50578800 | H | 4.95725400  | 0.12125700  | -3.32865100 |
| F | -4.86766900 | -2.30432900 | -0.57035500 | C | 3.72327200  | -1.11835100 | -2.08242400 |
| O | -0.10426700 | 0.13427500  | -1.50206400 | H | 4.02924300  | -2.03283300 | -2.57683800 |
| N | 1.58820100  | -0.01562600 | 0.78600600  | C | 2.86612700  | 1.26795300  | -0.89370500 |
| C | 2.22946200  | -0.10996300 | 2.15159700  | C | 2.14352500  | -2.53312500 | -0.73700700 |
| C | -4.89023900 | 0.05628900  | -0.54535900 | H | 1.52632700  | -2.41909800 | 0.15424700  |
| C | -4.19475600 | 1.25791400  | -0.46532200 | C | -0.26334400 | -0.10633500 | 2.28414800  |
| C | 1.03508600  | 0.20935100  | 3.06738400  | C | -0.78654200 | -1.52532800 | 2.61043800  |
| H | 1.08531500  | -0.34246900 | 4.00820100  | H | -0.05347100 | -2.29869100 | 2.37776400  |
| H | 1.05144500  | 1.27475100  | 3.31173100  | H | -1.69280000 | -1.75602800 | 2.05070800  |
| C | -0.57158300 | 0.05833800  | -0.34835500 | C | -1.34428300 | 0.92187100  | 2.67497000  |
| C | -2.81234000 | 1.23771100  | -0.34055100 | H | -2.32480000 | 0.66080700  | 2.27802600  |
| C | -2.09255000 | 0.04859000  | -0.27511600 | H | -1.08812900 | 1.92592600  | 2.33017300  |
| C | 2.81416600  | -1.50948000 | 2.40900600  | C | 3.78769300  | 1.27413700  | -1.94355600 |
| H | 2.06958900  | -2.29933200 | 2.31926800  | H | 4.14506700  | 2.22187200  | -2.32866600 |
| H | 3.62879200  | -1.72130000 | 1.71592700  | C | 3.38468000  | 3.63675600  | -0.05951000 |
| H | 3.22147100  | -1.54315300 | 3.42288100  | H | 4.10077300  | 3.25267500  | 0.67031100  |
| C | 2.41581400  | 0.01971200  | -0.40870000 | H | 3.94840000  | 3.94591700  | -0.94380900 |
| C | 3.35677000  | 0.91310900  | 2.33743300  | H | 2.92263200  | 4.53622000  | 0.35798200  |
| H | 4.17575100  | 0.74291000  | 1.63661600  | C | 1.34002000  | 3.18108600  | -1.47538600 |
| H | 2.99854300  | 1.93449100  | 2.21725300  | H | 1.88796100  | 3.46229000  | -2.37973000 |
| H | 3.75473000  | 0.81390000  | 3.35082800  | H | 0.57908200  | 2.45295700  | -1.75517300 |
| C | 2.30042700  | 2.60271100  | -0.41390300 | H | 0.84497300  | 4.07765800  | -1.08995600 |
| H | 1.70964100  | 2.41741600  | 0.48484200  | C | 1.19833700  | -2.93240300 | -1.89141500 |
| C | 0.22149500  | -0.00967400 | 0.83369400  | H | 1.76655300  | -3.14295200 | -2.80238500 |
| C | -2.81504900 | -1.13461300 | -0.37254100 | H | 0.63989000  | -3.83565900 | -1.62736300 |
| C | 3.15609700  | -3.66153700 | -0.47002200 | H | 0.48915800  | -2.13504300 | -2.11258400 |
| H | 3.75040500  | -3.88473000 | -1.36018800 | H | -1.02458600 | -1.59253100 | 3.67650400  |
| H | 3.84950200  | -3.41504800 | 0.33685000  | H | -1.43185800 | 0.94961700  | 3.76550600  |
| H | 2.62995800  | -4.58006400 | -0.19405000 |   |             |             |             |

**xyz coordinates of optimized structure of O<sub>2</sub><sup>3</sup>**

(E = -150.361053)

|   | x          | y          | z          |            |            |             |
|---|------------|------------|------------|------------|------------|-------------|
| O | 0.00000000 | 0.00000000 | 0.60283800 |            |            |             |
| O |            |            |            | 0.00000000 | 0.00000000 | -0.60283800 |

**xyz coordinates of optimized structure of the C-adduct of O<sub>2</sub><sup>3</sup> on 2a'**

(E = -1312.102721)

|   | x           | y           | z           |   | x           | y           | z           |
|---|-------------|-------------|-------------|---|-------------|-------------|-------------|
| O | 1.26869400  | -2.21246600 | 0.69722200  | C | -3.68619400 | -1.14967500 | -0.26509200 |
| N | -0.26156700 | 0.17782200  | 0.62097700  | H | -4.24012300 | -2.07913100 | -0.20902600 |
| N | 2.02639300  | -2.00483200 | -1.41707700 | C | -4.31419200 | -0.01941900 | -0.75867800 |
| C | 0.95553100  | -0.01413100 | -0.14350400 | H | -5.35133700 | -0.05765600 | -1.07413200 |
| C | 2.08617400  | 0.76531000  | 0.66289900  | C | -3.59142800 | 1.15623600  | -0.85918700 |
| C | 1.54263900  | 0.59814700  | 2.10251300  | H | -4.07118600 | 2.03738000  | -1.26863900 |
| H | 1.87767000  | 1.40873900  | 2.75245100  | C | -2.25570500 | 1.23910600  | -0.45485900 |
| H | 1.92216800  | -0.33800600 | 2.51527700  | C | -1.76798600 | -2.47088200 | 0.59038000  |
| C | -0.00029100 | 0.53125000  | 2.05362500  | H | -0.78715300 | -2.29091200 | 1.01231600  |
| C | 1.40991300  | -1.51524000 | -0.30264500 | C | -1.56935600 | -3.38471700 | -0.63665700 |
| C | 2.36657000  | -3.42798900 | -1.42967500 | H | -2.52773500 | -3.65256700 | -1.09263200 |
| C | 2.46550800  | -1.28470400 | -2.61063200 | H | -1.06499900 | -4.31016600 | -0.34259500 |
| C | 2.15912100  | 2.27646300  | 0.28641000  | H | -0.96548800 | -2.89161800 | -1.40125300 |
| H | 2.64600800  | 2.77533300  | 1.13014000  | C | -2.61132000 | -3.19145000 | 1.65832600  |
| H | 1.15301700  | 2.68977200  | 0.25104800  | H | -3.58085600 | -3.51960400 | 1.27220600  |
| C | 2.89741200  | 2.68151800  | -0.99721900 | H | -2.79737500 | -2.55439000 | 2.52585600  |
| H | 3.94607700  | 2.37518700  | -0.98934000 | H | -2.08199100 | -4.08375100 | 2.00584200  |
| H | 2.42612000  | 2.27043500  | -1.88943000 | C | -1.57687300 | 2.58681100  | -0.68807900 |
| H | 2.88350000  | 3.77117800  | -1.09219900 | H | -0.57004500 | 2.51547800  | -0.29107500 |
| C | 3.49631100  | 0.12599400  | 0.55251900  | C | -2.29198800 | 3.75309400  | 0.02390100  |
| H | 3.42835000  | -0.92591400 | 0.83435700  | H | -1.70720700 | 4.67206000  | -0.08379300 |
| H | 3.83995800  | 0.15105900  | -0.48537700 | H | -3.27588900 | 3.94363400  | -0.41328700 |
| C | 4.56595700  | 0.77878500  | 1.44002300  | H | -2.43395600 | 3.56593100  | 1.08886100  |
| H | 4.74549900  | 1.82535900  | 1.18477900  | C | -1.45599000 | 2.90826200  | -2.19323700 |
| H | 5.51475200  | 0.24793700  | 1.32568100  | H | -0.96399000 | 2.10301700  | -2.73742600 |
| H | 4.29537500  | 0.73385700  | 2.49788800  | H | -0.87989900 | 3.82833900  | -2.33477100 |
| C | -0.50185400 | -0.54547900 | 3.03284600  | H | -2.44186500 | 3.06569900  | -2.64071900 |
| H | -0.05914100 | -1.51351600 | 2.80527100  | H | 3.42848000  | -1.69928500 | -2.91990800 |
| H | -0.21999300 | -0.26590500 | 4.05292500  | H | 1.75205700  | -1.40002000 | -3.43212300 |
| H | -1.59041100 | -0.62889400 | 3.00331700  | H | 2.59971400  | -0.22614100 | -2.42018400 |
| C | -0.64803500 | 1.86408400  | 2.46975000  | H | 1.88227200  | -3.92026000 | -0.59243400 |
| H | -0.44171600 | 2.05107300  | 3.52708600  | H | 2.02931800  | -3.87367400 | -2.36983200 |
| H | -1.73201600 | 1.81980100  | 2.34934600  | H | 3.45058800  | -3.56588700 | -1.34589400 |
| H | -0.26960000 | 2.71202600  | 1.90083200  | O | 0.75727300  | 0.62783000  | -1.44614000 |
| C | -1.61366800 | 0.08349000  | 0.08983000  | O | -0.07225500 | -0.07132700 | -2.21354700 |
| C | -2.35199600 | -1.13307000 | 0.15361000  |   |             |             |             |

**xyz coordinates of optimized structure of the C-adduct of O<sub>2</sub><sup>3</sup> on 2b'**  
(E = -1694.378670)

|   | x           | y           | z           |   | x           | y           | z           |
|---|-------------|-------------|-------------|---|-------------|-------------|-------------|
| O | -0.78854800 | 0.95284700  | 1.70558800  | H | 0.55029500  | 2.43262100  | 0.98824300  |
| N | 1.65633700  | 0.16262000  | 0.61426800  | C | -0.27383000 | 3.40585300  | -0.72491600 |
| N | -2.12601300 | 0.00603300  | 0.15381900  | H | 0.02313100  | 4.09739100  | -1.51921300 |
| C | 0.45705700  | -0.64359700 | 0.49902200  | H | -1.09081100 | 3.86777500  | -0.16436600 |
| C | 0.59794800  | -1.76752100 | 1.61958200  | H | -0.65610500 | 2.50085300  | -1.20143200 |
| C | 1.40264600  | -0.97659300 | 2.68036500  | C | 1.41716500  | 4.37873000  | 0.88205100  |
| H | 1.99291100  | -1.64588800 | 3.30858000  | H | 1.69020100  | 5.14706600  | 0.15327300  |
| H | 0.70845700  | -0.44154200 | 3.33000000  | H | 2.28832400  | 4.19555100  | 1.51490700  |
| C | 2.31015300  | 0.04660200  | 1.95955000  | H | 0.62729200  | 4.79841700  | 1.51225200  |
| C | -0.88095200 | 0.16351100  | 0.78616000  | C | 3.49366600  | -1.13426300 | -1.44336000 |
| C | 1.43638900  | -3.00019700 | 1.16155400  | H | 2.95368200  | -1.62355000 | -0.64059000 |
| H | 1.73209100  | -3.50603800 | 2.08528300  | C | 4.99259200  | -1.45576300 | -1.27702500 |
| H | 2.36810800  | -2.65732900 | 0.71728800  | H | 5.14120400  | -2.53961500 | -1.24284800 |
| C | 0.80806400  | -4.04538100 | 0.23076700  | H | 5.57797400  | -1.07643700 | -2.11883200 |
| H | -0.14493600 | -4.42378300 | 0.60769000  | H | 5.41021300  | -1.02801800 | -0.36452900 |
| H | 0.65182900  | -3.65830900 | -0.77557100 | C | 2.98405800  | -1.73523100 | -2.77091300 |
| H | 1.48285800  | -4.90227900 | 0.14858200  | H | 1.92780700  | -1.51966100 | -2.92890000 |
| C | -0.75844200 | -2.23871600 | 2.21245800  | H | 3.12193500  | -2.82119900 | -2.76954900 |
| H | -1.30702300 | -1.36842600 | 2.57728900  | H | 3.54098600  | -1.33391100 | -3.62270100 |
| H | -1.37694300 | -2.68907900 | 1.43261600  | O | 0.45033300  | -1.23194000 | -0.82711700 |
| C | -0.64323700 | -3.23122200 | 3.37854900  | O | 0.13090300  | -0.33159200 | -1.75238600 |
| H | -0.20305800 | -4.18470200 | 3.07913100  | C | -3.15692300 | 0.99191100  | 0.34508500  |
| H | -1.63832800 | -3.44432500 | 3.77704300  | C | -4.26063200 | 0.65570100  | -0.46093700 |
| H | -0.04443500 | -2.82723100 | 4.19885900  | C | -3.19284500 | 2.14018200  | 1.14075500  |
| C | 2.31777600  | 1.37421900  | 2.73878900  | C | -5.39555700 | 1.46600400  | -0.49700800 |
| H | 1.30987800  | 1.76763800  | 2.85438200  | C | -4.33519000 | 2.93726200  | 1.09238100  |
| H | 2.73968100  | 1.20422600  | 3.73425700  | H | -2.37361100 | 2.40024900  | 1.78658100  |
| H | 2.94131100  | 2.11904000  | 2.24023600  | C | -5.42797300 | 2.61357800  | 0.28333300  |
| C | 3.77072300  | -0.43346200 | 1.87144000  | H | -6.23869100 | 1.19820200  | -1.12352200 |
| H | 4.19806600  | -0.47444900 | 2.87691800  | H | -4.37156900 | 3.82796500  | 1.70940600  |
| H | 4.37198300  | 0.26489300  | 1.28634700  | H | -6.30144200 | 3.25514500  | 0.27152500  |
| H | 3.86347900  | -1.42344900 | 1.42887300  | C | -2.66516300 | -0.99384500 | -0.72425900 |
| C | 2.25579700  | 0.95329200  | -0.45330900 | C | -3.95913700 | -0.59368100 | -1.11953100 |
| C | 1.99144300  | 2.34701100  | -0.57397800 | C | -2.18199200 | -2.23809500 | -1.12755200 |
| C | 2.69450100  | 3.10041000  | -1.51974800 | C | -4.73696600 | -1.39422100 | -1.95640200 |
| H | 2.49043100  | 4.16134300  | -1.60025700 | C | -2.97150900 | -3.03029500 | -1.95730500 |
| C | 3.62775000  | 2.52808600  | -2.36588000 | H | -1.21585900 | -2.60121100 | -0.83417600 |
| H | 4.16111500  | 3.13440400  | -3.08997300 | C | -4.23539500 | -2.61517600 | -2.38346000 |
| C | 3.85236700  | 1.16487600  | -2.28790600 | H | -5.72704000 | -1.06801400 | -2.25363100 |
| H | 4.55877000  | 0.70609300  | -2.96946100 | H | -2.58567700 | -3.99231700 | -2.27450300 |
| C | 3.18855300  | 0.35891200  | -1.35853000 | H | -4.82525600 | -3.25141900 | -3.03272600 |
| C | 0.91426200  | 3.08915500  | 0.20716600  |   |             |             |             |

**xyz coordinates of optimized structure of 2c'**  
(E = -420.866036)

|   | x           | y           | z           |   | x           | y           | z           |
|---|-------------|-------------|-------------|---|-------------|-------------|-------------|
| C | -0.67580600 | 0.38564300  | -0.56191500 | H | 2.38333700  | 2.21154800  | -0.29253200 |
| H | -0.72212200 | 1.10235800  | -1.37845800 | H | 0.73209200  | 2.09502200  | 0.34939000  |
| C | 0.60134300  | -0.40863200 | -0.36235900 | H | 2.10716900  | 1.77834900  | 1.40861400  |
| N | 1.70396500  | 0.24300800  | 0.03203100  | C | -3.05984300 | 0.71471600  | -0.38994800 |
| O | 0.49360300  | -1.58669400 | -0.66784900 | H | -2.89513900 | 1.38239700  | -1.23227200 |
| N | -1.78046600 | 0.10659200  | 0.03083000  | H | -3.74414300 | -0.08527200 | -0.67709000 |
| C | 2.97676800  | -0.48455200 | 0.10282000  | H | -3.48261200 | 1.26612700  | 0.45055000  |
| H | 3.37138800  | -0.43922200 | 1.12018000  | C | -1.88901200 | -0.88712100 | 1.12026700  |
| H | 2.80826700  | -1.52017700 | -0.18107200 | H | -0.90789100 | -1.13358000 | 1.51237700  |
| H | 3.69719400  | -0.03052500 | -0.58175000 | H | -2.52140200 | -0.46748400 | 1.90201200  |
| C | 1.73197500  | 1.65907700  | 0.38926600  | H | -2.35200600 | -1.78797400 | 0.71402400  |

**xyz coordinates of optimized structure of 2c<sup>+</sup>**

(E = -421.077587)

|   | x           | y           | z           |   | x           | y           | z           |
|---|-------------|-------------|-------------|---|-------------|-------------|-------------|
| C | -0.58181500 | 0.49850100  | -0.08337400 | H | 1.97328500  | 2.14884800  | -0.75814800 |
| H | -0.43410500 | 1.55640700  | -0.23442100 | H | 1.29439400  | 2.07987200  | 0.88670000  |
| C | 0.55282500  | -0.39941000 | -0.04865500 | H | 3.01197100  | 1.79930700  | 0.63177200  |
| N | 1.80590400  | 0.19558600  | 0.09637600  | C | -2.91150400 | 1.14108600  | -0.15956200 |
| O | 0.45707700  | -1.63296600 | -0.14574300 | H | -2.53769400 | 2.02492400  | -0.67780900 |
| N | -1.89298300 | 0.10562600  | -0.13580400 | H | -3.79266300 | 0.77576500  | -0.69288500 |
| C | 2.98668700  | -0.62417400 | -0.11992600 | H | -3.22206000 | 1.43283800  | 0.85473500  |
| H | 3.70279900  | -0.48624300 | 0.69740700  | C | -2.35915900 | -1.20223400 | 0.31435000  |
| H | 2.67642100  | -1.66520400 | -0.15555400 | H | -1.56647400 | -1.93017400 | 0.17281200  |
| H | 3.48762400  | -0.36836500 | -1.06401800 | H | -2.64180000 | -1.16790500 | 1.37692600  |
| C | 2.02000400  | 1.62612700  | 0.20908000  | H | -3.24099000 | -1.48420100 | -0.26705600 |

**xyz coordinates of optimized structure of 2c<sup>-</sup>**

(E = -421.097386)

|   | x           | y           | z           |   | x           | y           | z           |
|---|-------------|-------------|-------------|---|-------------|-------------|-------------|
| C | -0.56692300 | 0.47355200  | -0.06274100 | H | 1.85987400  | 2.08543300  | -0.57719800 |
| H | -0.50659100 | 1.47973700  | 0.34689000  | H | 1.31709200  | 1.99581200  | 1.11059700  |
| C | 0.51152900  | -0.40397400 | -0.06882700 | H | 3.03141000  | 1.77748000  | 0.73388700  |
| N | 1.82657000  | 0.13271300  | 0.30706800  | C | -2.84776500 | 0.99618700  | -0.56884100 |
| O | 0.47477100  | -1.63540200 | -0.33895900 | H | -2.50620000 | 1.55860700  | -1.44404300 |
| N | -1.90096100 | -0.04064200 | -0.26336700 | H | -3.83546100 | 0.56829500  | -0.78799700 |
| C | 2.93735200  | -0.55121200 | -0.31984200 | H | -2.98871100 | 1.73402100  | 0.26082500  |
| H | 3.84570000  | -0.45765800 | 0.29231500  | C | -2.36193700 | -0.91885900 | 0.79928400  |
| H | 2.65734100  | -1.59903000 | -0.41778200 | H | -1.62439900 | -1.71527100 | 0.91342700  |
| H | 3.17584300  | -0.16221900 | -1.33308400 | H | -2.48173400 | -0.39670500 | 1.77547800  |
| C | 2.01241600  | 1.56115900  | 0.38766800  | H | -3.32962500 | -1.37090200 | 0.53225100  |

**xyz coordinates of optimized transition state for the rotation around N2-C2 bond of 2c<sup>+</sup>**

(E = -420.826001; 1 imaginary frequency)

|   | x           | y           | z           |   | x           | y           | z           |
|---|-------------|-------------|-------------|---|-------------|-------------|-------------|
| C | 0.47960200  | -0.40197800 | -0.37016300 | H | -1.41409000 | -1.57423900 | 1.38448100  |
| H | 0.21043500  | -1.37607700 | -0.77071100 | H | -1.35634800 | 0.02380500  | 2.19444000  |
| C | -0.63835200 | 0.64276300  | -0.23609200 | H | -2.90250400 | -0.69560400 | 1.76931500  |
| N | -1.89411300 | 0.15023200  | 0.15468400  | C | 2.70497100  | -1.31530100 | -0.25820700 |
| O | -0.37257900 | 1.79304800  | -0.44847700 | H | 2.23741900  | -2.16301600 | -0.75310000 |
| N | 1.71393600  | -0.23252900 | -0.05935200 | H | 3.52015200  | -0.92510700 | -0.86890000 |
| C | -2.62281300 | -0.56601300 | -0.90832800 | H | 3.09632500  | -1.61410400 | 0.71526200  |
| H | -3.65400400 | -0.70023800 | -0.58000500 | C | 2.28569200  | 1.01948000  | 0.49155700  |
| H | -2.63881600 | 0.03733600  | -1.81661700 | H | 1.50495900  | 1.68080800  | 0.84702800  |
| H | -2.20435100 | -1.55957100 | -1.13339800 | H | 2.97036200  | 0.74596400  | 1.29344000  |
| C | -1.87034700 | -0.57282300 | 1.43913100  | H | 2.83981800  | 1.51497200  | -0.30813000 |

**xyz coordinates of optimized transition state for the rotation around N2-C2 bond of 2c'**

(E = -421.067243; 1 imaginary frequency)

|   | x           | y           | z           |   | x           | y           | z           |
|---|-------------|-------------|-------------|---|-------------|-------------|-------------|
| C | 0.62731200  | -0.56575000 | -0.02756000 | H | -2.90499600 | 0.86648300  | -1.19815800 |
| H | 0.46286600  | -1.63263200 | -0.07155200 | H | -1.99270100 | -0.35761800 | -2.11184300 |
| C | -0.53254100 | 0.26042900  | -0.00064100 | H | -3.45147100 | -0.83134500 | -1.23069300 |
| N | -1.76122800 | -0.52813000 | -0.02977500 | C | 2.98761400  | -1.16144900 | -0.04822700 |
| O | -0.56064500 | 1.49883500  | 0.04409900  | H | 2.56403800  | -2.16453400 | -0.07043700 |
| N | 1.92616100  | -0.17121500 | -0.00282200 | H | 3.60854200  | -1.02104700 | -0.94095600 |
| C | -2.52311100 | -0.34346400 | 1.21011400  | H | 3.63454100  | -1.07163100 | 0.83209500  |
| H | -3.40405600 | -0.99057100 | 1.18812400  | C | 2.36589000  | 1.21820200  | 0.04770300  |
| H | -1.90854800 | -0.63755300 | 2.06466800  | H | 1.49704000  | 1.86903200  | 0.07534600  |
| H | -2.85097400 | 0.69660400  | 1.35872300  | H | 2.98332400  | 1.37854700  | 0.93925200  |
| C | -2.57222500 | -0.18220200 | -1.20213400 | H | 2.97538900  | 1.44640000  | -0.83470800 |

**xyz coordinates of optimized transition state for the rotation around N2-C2 bond of 2c''**

(E = -421.087817; 1 imaginary frequency)

|   | x           | y           | z           |   | x           | y           | z           |
|---|-------------|-------------|-------------|---|-------------|-------------|-------------|
| C | 0.44072700  | -0.39399100 | -0.04732800 | H | -1.77261600 | -1.10127600 | 1.76548300  |
| H | 0.18097300  | -1.32767700 | 0.44819200  | H | -1.73982400 | 0.65423700  | 2.02809900  |
| C | -0.51222400 | 0.56668900  | -0.31356500 | H | -3.26767500 | -0.14666000 | 1.60637600  |
| N | -1.92789300 | 0.15321200  | 0.01704100  | C | 2.64467700  | -1.34161300 | -0.11266400 |
| O | -0.36370000 | 1.72171100  | -0.77808800 | H | 2.28400400  | -2.11736200 | -0.79707800 |
| N | 1.84988200  | -0.15293800 | -0.26226000 | H | 3.69626300  | -1.13305500 | -0.34799100 |
| C | -2.46066400 | -0.86481600 | -0.85958800 | H | 2.61584800  | -1.77263900 | 0.91831500  |
| H | -3.55558300 | -0.93332600 | -0.74958500 | C | 2.36935900  | 0.96323800  | 0.51117400  |
| H | -2.24368400 | -0.59622300 | -1.89651800 | H | 1.73662400  | 1.82929100  | 0.30672000  |
| H | -2.04608500 | -1.88042100 | -0.68397300 | H | 2.36738400  | 0.76938900  | 1.60730500  |
| C | -2.18198400 | -0.13146700 | 1.41060700  | H | 3.40070900  | 1.19188500  | 0.20408600  |

# NMR spectra

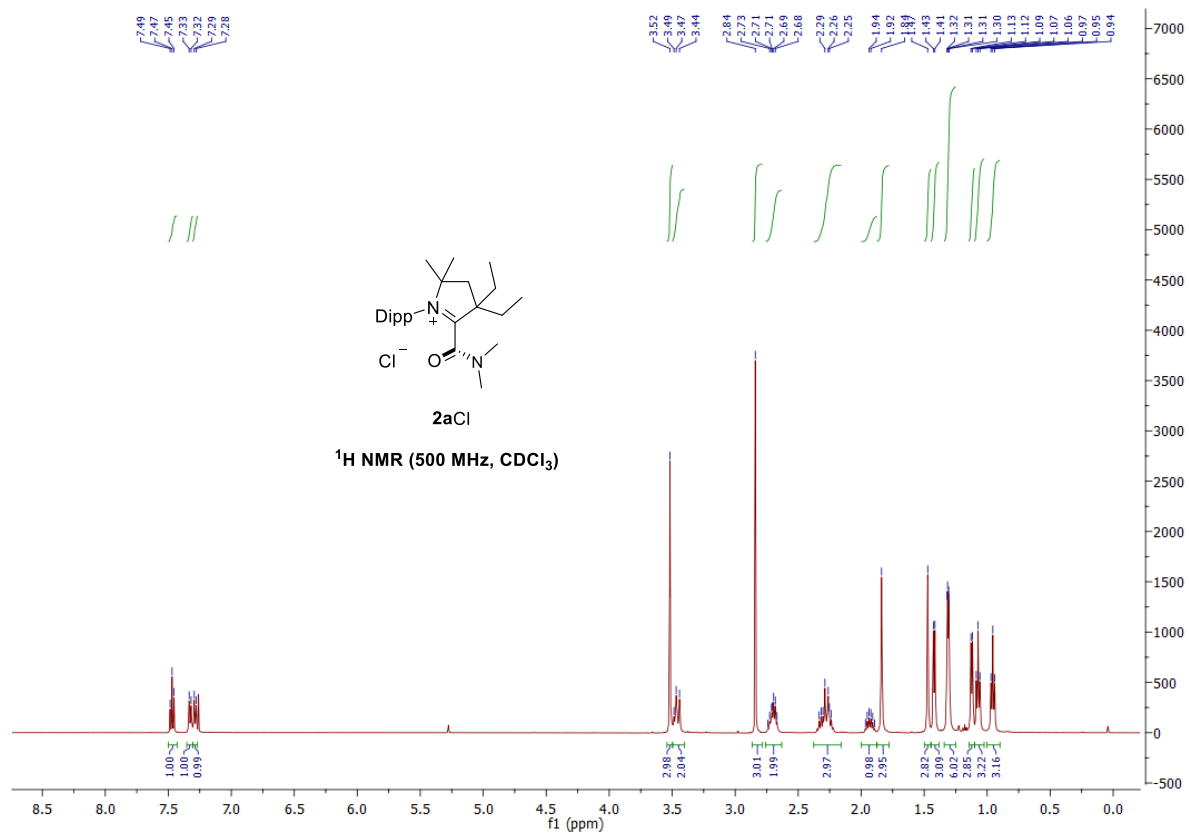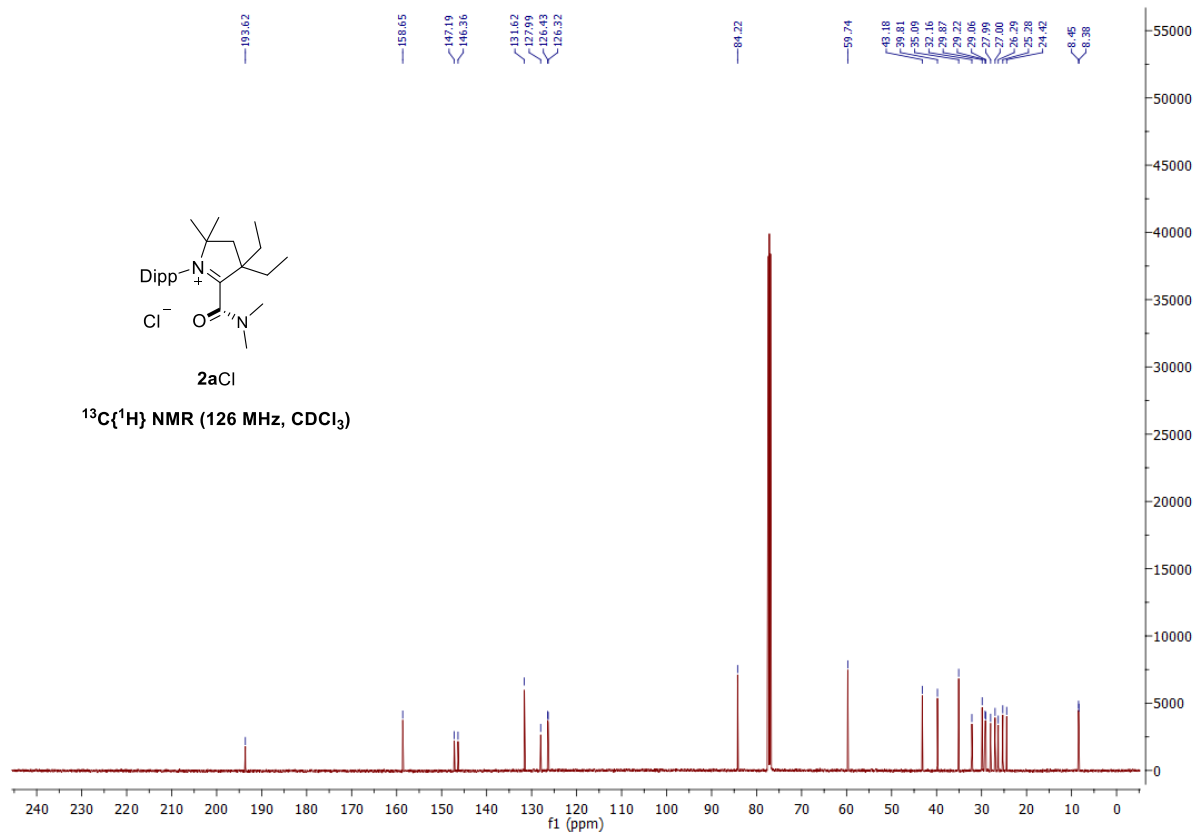



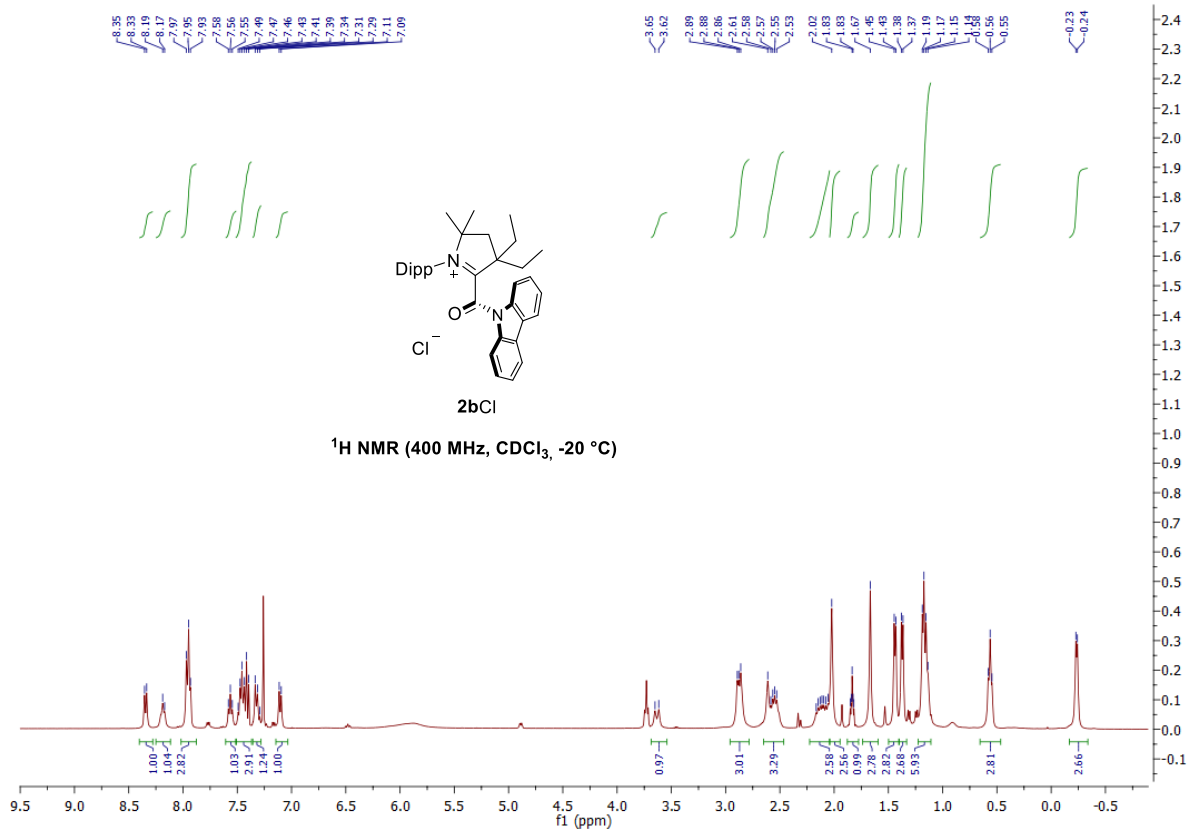

**2bCl**  
**<sup>1</sup>H NMR (400 MHz, CDCl<sub>3</sub>, -20 °C)**

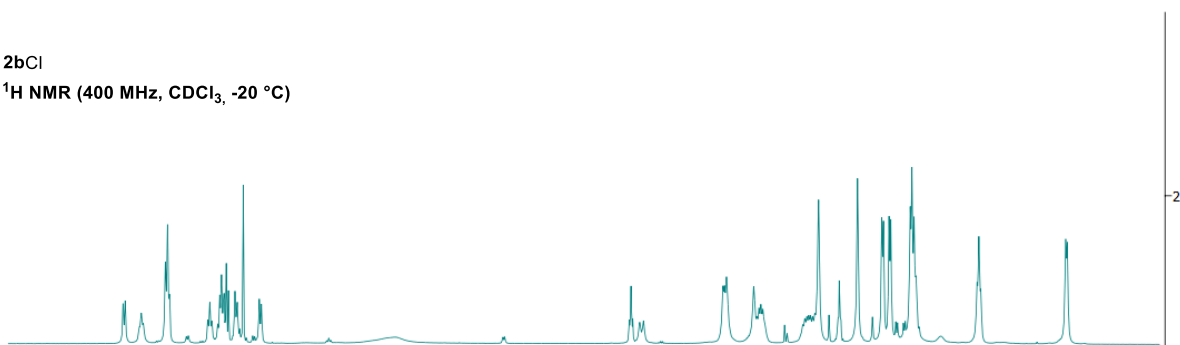

**2bCl**  
**<sup>1</sup>H NMR (500 MHz, CDCl<sub>3</sub>, 25 °C)**

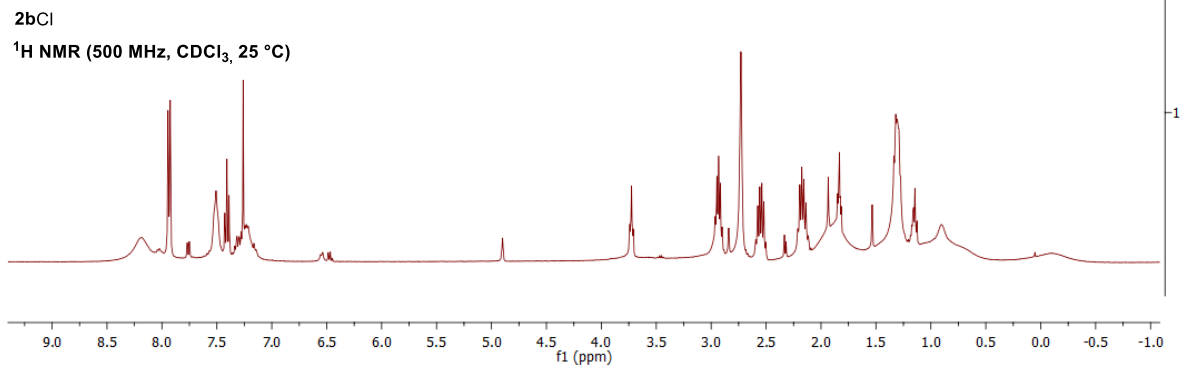

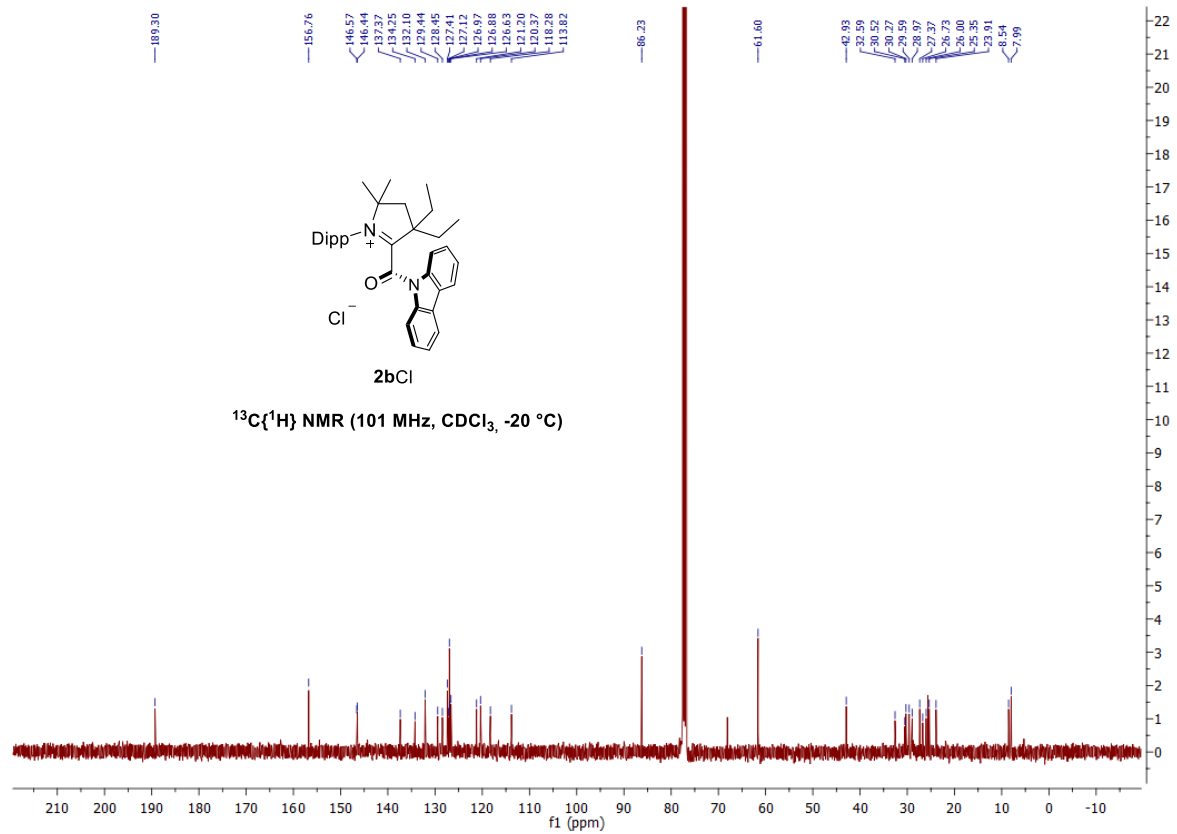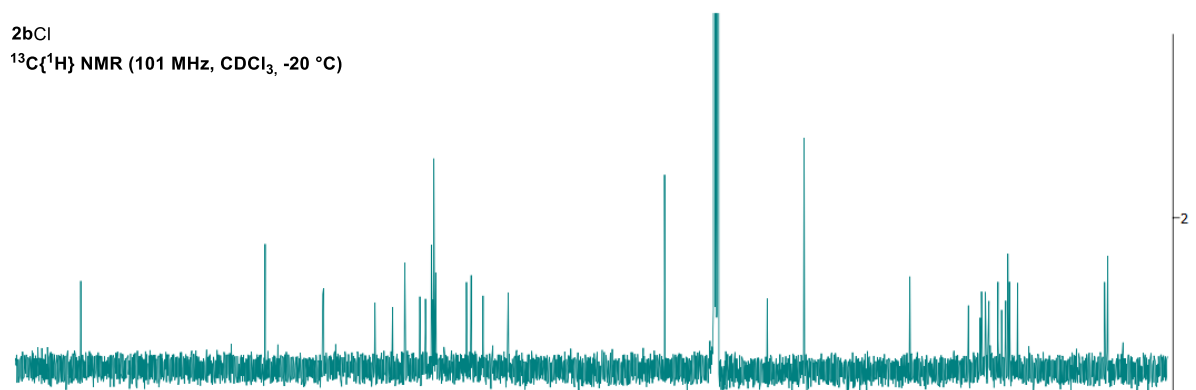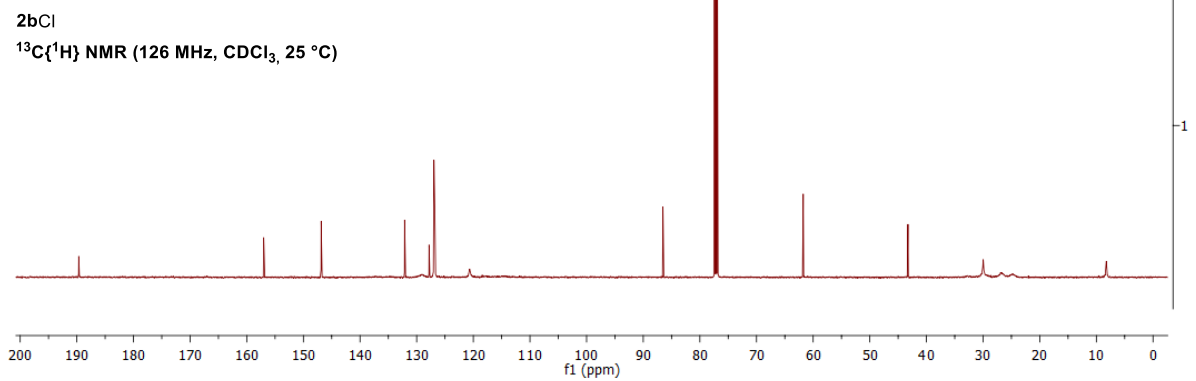

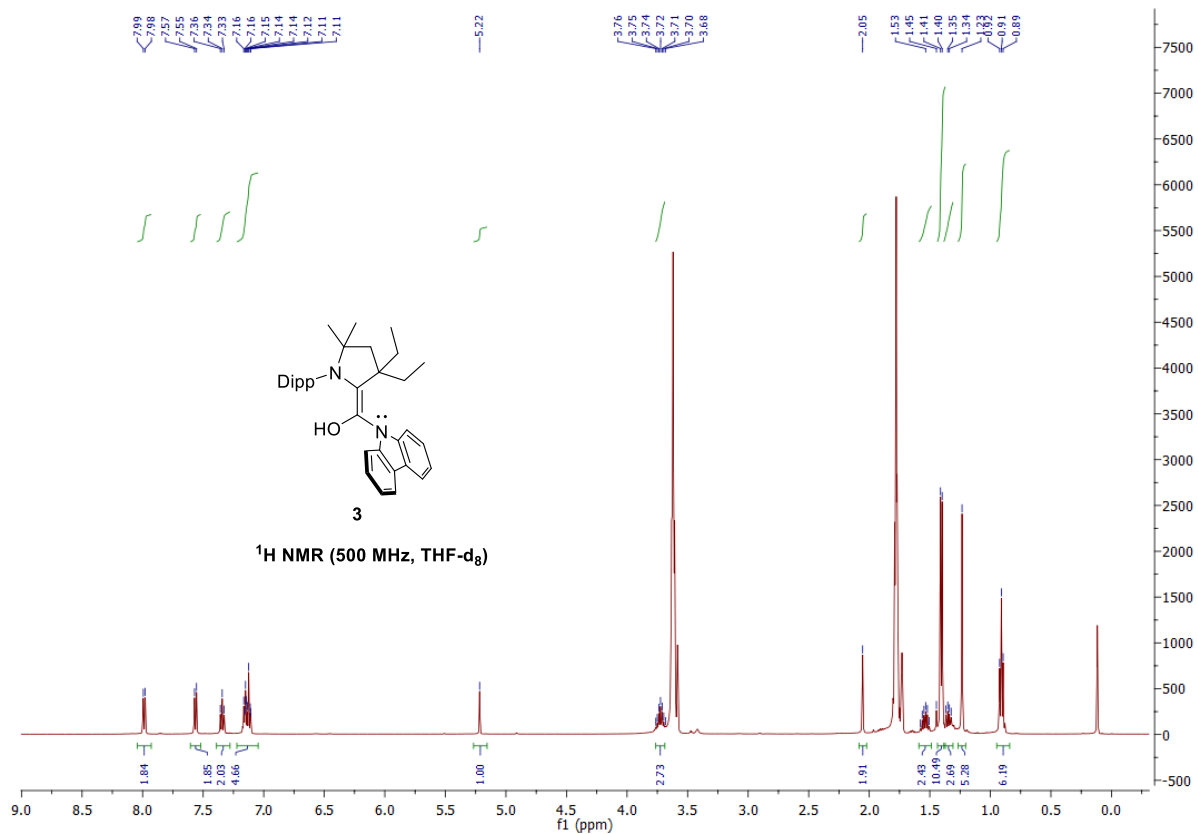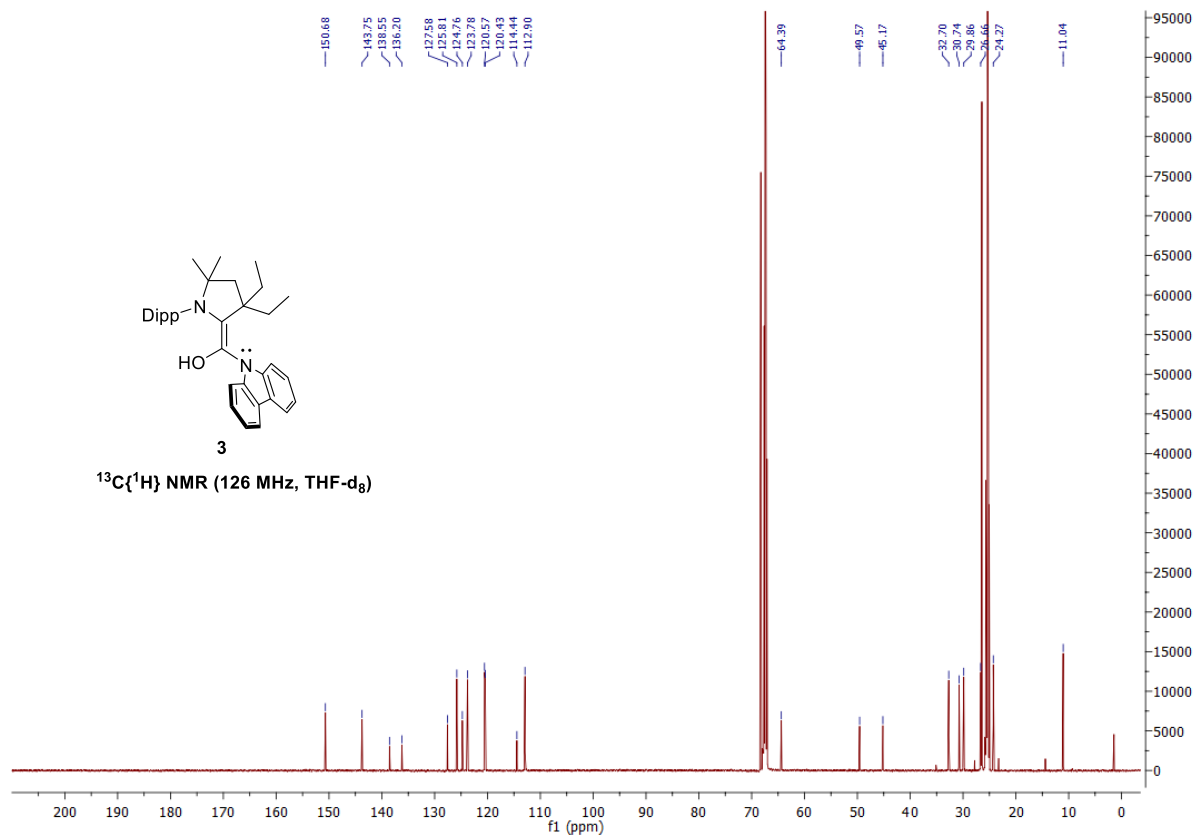

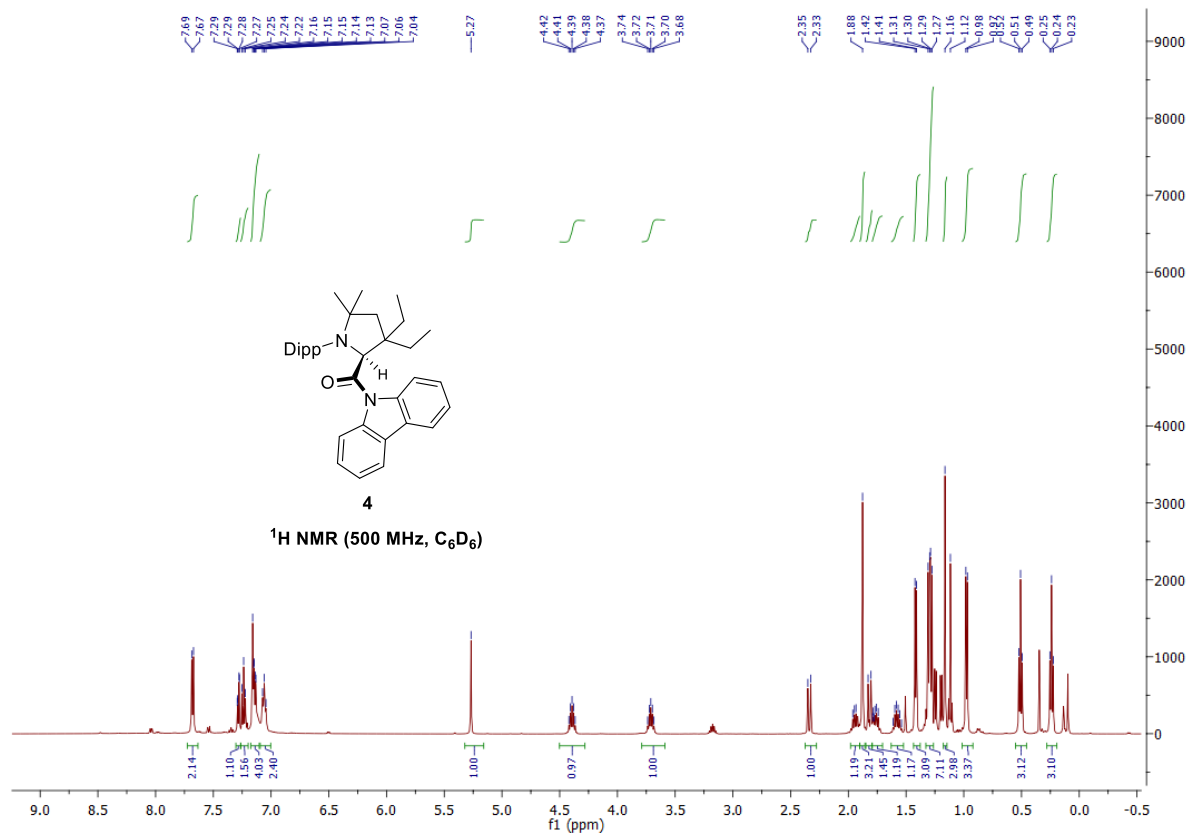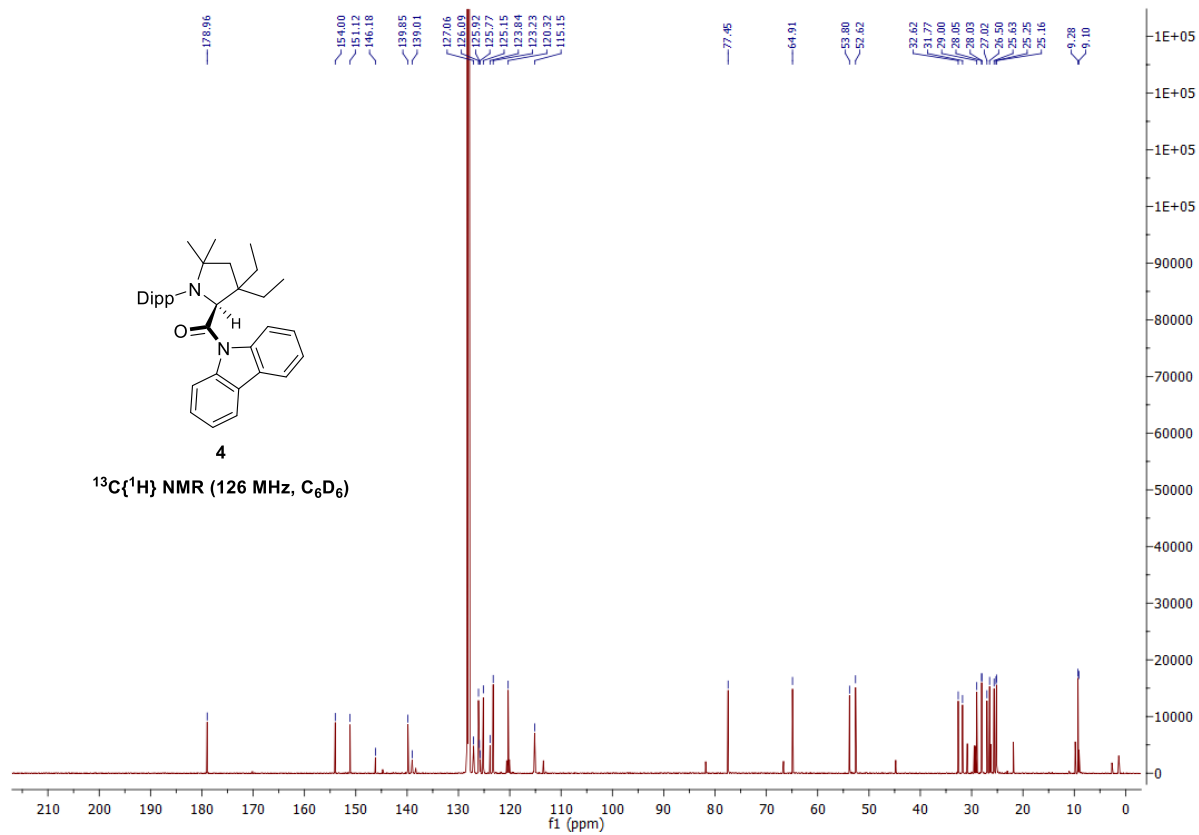

## References

---

- <sup>1</sup> a) J. K. Mahoney, D. Martin, C. E. Moore, A. L. Rheingold and G. Bertrand, *J. Am. Chem. Soc.*, 2013, **135**, 18766-18769. b) L. Zhou, D. Zhang, J. Hu, Y. Wu, J. Geng and X. Hu, *Organometallics*, 2021, **40**, 2643-2650.
- <sup>2</sup> Allenmark, S. *Tetrahedron Lett.*, 1990, **131**, 1455-1458.
- <sup>3</sup> D. J. Dixon and A. C. Lucas, *Synlett*, 2004, **6**, 1092-1094.
- <sup>4</sup> Experimental EPR spectra were fitted with the EasySpin simulation package: S. Stoll and A. Schweiger, *J. Magn. Reson.*, 2006, **178**, 42-55.
- <sup>5</sup> ShelXT: G.M. Sheldrick, *Acta Cryst.*, 2015, **A71**, 3-8.
- <sup>6</sup> Olex2: O. V. Dolomanov, L. J. Bourhis, R. J. Gildea, J. A. K. Howard and H. Puschmann, *J. Appl. Cryst.*, 2009, **42**, 339-341.
- <sup>7</sup> CrysAlisPro 1.171.39.46 (Rigaku OD, 2018)
- <sup>8</sup> ShelXL: G.M. Sheldrick, *Acta Cryst.*, 2015, **C71**, 3-8.
- <sup>9</sup> A. J. M. Duisenberg, L. M. J. Kroon-Batenburg and M. M. Schreurs, *J. Appl. Crystallogr.*, 2003, **36**, 220-229.
- <sup>10</sup> SADABS v2.10, Program for empirical absorption correction of area detector data, G. M. Sheldrick, University of Göttingen, Germany, 2003.
- <sup>11</sup> XPREP v2005/3 ©Bruker AXS.
- <sup>12</sup> G. M. Sheldrick, *Acta Cryst.*, 2008, **A64**, 112-122.
- <sup>13</sup> Gaussian 09, Revision D.01, M. J. Frisch, G. W. Trucks, H. B. Schlegel, G. E. Scuseria, M. A. Robb, J. R. Cheeseman, G. Scalmani, V. Barone, B. Mennucci, G. A. Petersson, H. Nakatsuji, M. Caricato, X. Li, H. P. Hratchian, A. F. Izmaylov, J. Bloino, G. Zheng, J. L. Sonnenberg, M. Hada, M. Ehara, K. Toyota, R. Fukuda, J. Hasegawa, M. Ishida, T. Nakajima, Y. Honda, O. Kitao, H. Nakai, T. Vreven, J. A. Montgomery, Jr., J. E. Peralta, F. Ogliaro, M. Bearpark, J. J. Heyd, E. Brothers, K. N. Kudin, V. N.; Staroverov, R. Kobayashi, J. Normand, K., Raghavachari, A. Rendell, J. C. Burant, S. S. Iyengar, J. Tomasi, M. Cossi, N. Rega, J. M. Millam, M. Klene, J. E. Knox, J. B. Cross, V. Bakken, C. Adamo, J. Jaramillo, R. Gomperts, R. E. Stratmann, O. Yazyev, A. J. Austin, R. Cammi, C. Pomelli, J. W. Ochterski, R. L. Martin, K. Morokuma, V. G. Zakrzewski, G. A. Voth, P. Salvador, J. J. Dannenberg, S. Dapprich, A. D. Daniels, Ö. Farkas, J. B. Foresman, J. V. Ortiz, J. Cioslowski, D. J. Fox, Gaussian, Inc., Wallingford CT, 2009.
